# Supplementary material for: Synthesis, physical and electroluminescence properties of 3,6-dipyrenylcarbazole end capped oligofluorenes
Source: Royal Society of Chemistry journal article supplement (doi:10.1039/c5ra02382c), 2015-01-01
Supplement: c5ra02382c1.pdf [file c5ra02382c1.pdf]

# Supporting Information

## Synthesis, Physical and Electroluminescence Properties of 3,6-Dipyrenylcarbazole End Capped Oligofluorenes

*Tidaratana Sangchart,<sup>1</sup> Arunroj Niroram,<sup>1</sup> Teadkai Kaewpuang,<sup>2</sup> Narid Prachumrak,<sup>2</sup> Supawadee Namuangruk,<sup>3</sup> Taweesak Sudyoadsuk,<sup>1</sup> Tinnagon Keawin,<sup>1</sup> Sayant Saengsuwan,<sup>1</sup> Siriporn Jungsuttiwong,<sup>1</sup> Santi Maensiri,<sup>4</sup> Nawee Kungwan<sup>5</sup> and Vinich Promarak<sup>\*2,6</sup>*

<sup>1</sup>Department of Chemistry, Faculty of Science, Ubon Ratchathani University, Ubon Ratchathani 34190, Thailand

<sup>2</sup>School of Chemistry, Institute of Science, Suranaree University of Technology, Nakhon Ratchasima 30000, Thailand

<sup>3</sup>National Nanotechnology Center, 130 Thailand Science Park, Pathumthani 12120, Thailand

<sup>4</sup>School of Physic, Institute of Science, Suranaree University of Technology, Nakhon Ratchasima 30000, Thailand

<sup>5</sup>Chemistry Department, Faculty of Science, Chaing Mai University, Chaing Mai 50200, Thailand

<sup>6</sup>Vidyasirimedhi Institute of Science and Technology, Rayong 21210, Thailand

\*E-mail: [pvinich@sut.ac.th](mailto:pvinich@sut.ac.th)

---

### Content:

|                                                        |            |
|--------------------------------------------------------|------------|
| <b>1. Quantum chemical calculation results</b>         | <b>S2</b>  |
| <b>2. Multiple CV scans</b>                            | <b>Sx</b>  |
| <b>3. EL spectra</b>                                   | <b>S9</b>  |
| <b>4. <sup>1</sup>H and <sup>13</sup>C NMR spectra</b> | <b>S10</b> |

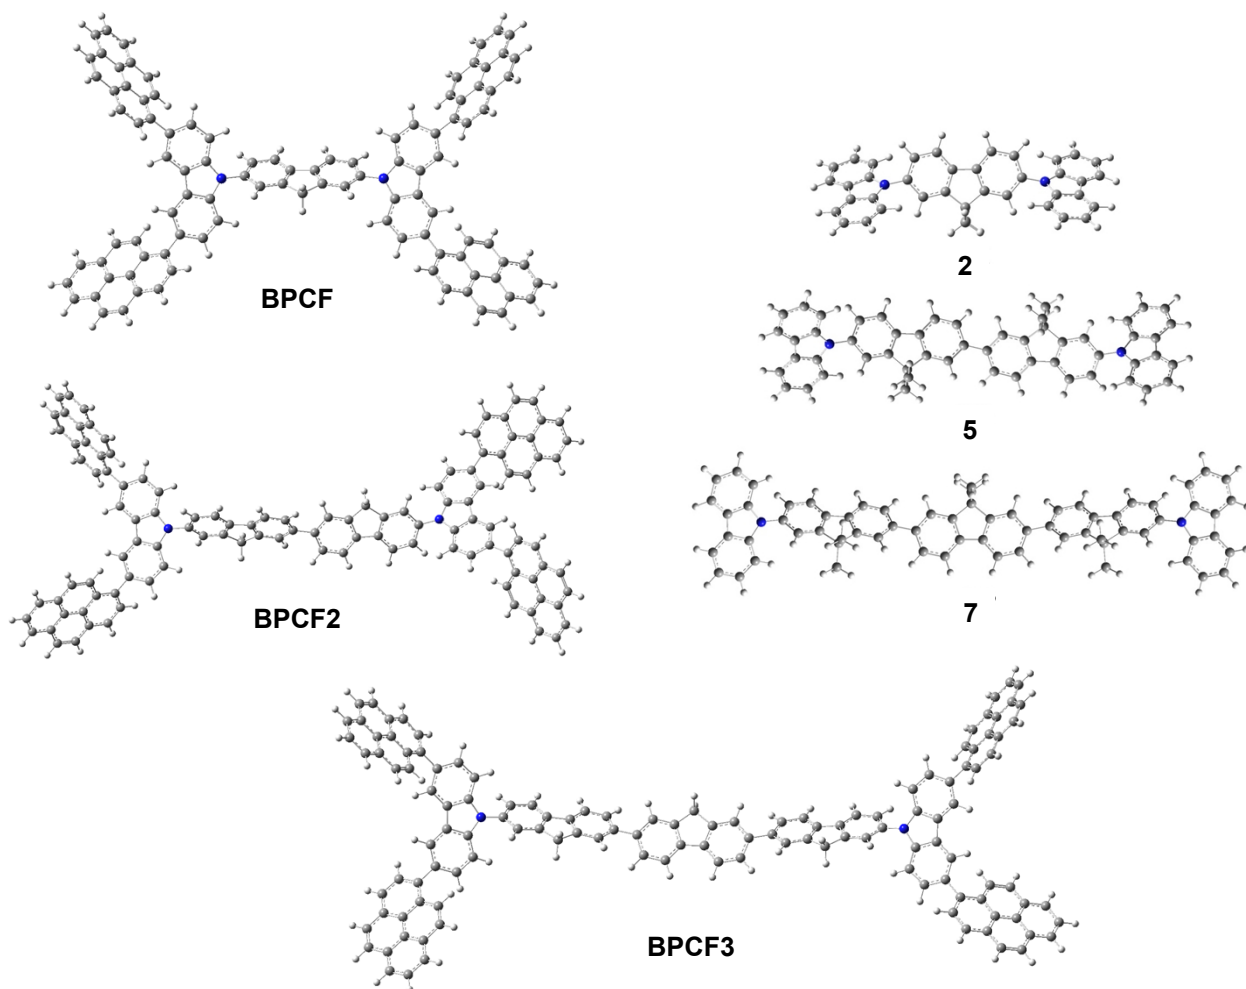

**Figure S1** The optimized structures of **BPCF<sub>n</sub>**, **2**, **5** and **7** calculated by B3LYP/6-31G(d,p) in CH<sub>2</sub>Cl<sub>2</sub> solvent.

Coordinate of the compounds optimized using B3LYP/6-31G(d,p) level of theory.

|                   |          |           |           |   |           |           |           |
|-------------------|----------|-----------|-----------|---|-----------|-----------|-----------|
| <b>Compound 2</b> |          |           |           | C | -1.179540 | 0.175510  | 0.185193  |
| C                 | 3.016120 | -1.150947 | -1.441838 | C | -2.537425 | 0.347558  | 0.419401  |
| C                 | 3.460371 | -0.317323 | -0.404243 | C | -3.460371 | -0.317323 | -0.404243 |
| C                 | 2.537425 | 0.347558  | 0.419402  | C | -3.016120 | -1.150947 | -1.441839 |
| C                 | 1.179540 | 0.175510  | 0.185193  | C | -1.651971 | -1.339366 | -1.662776 |
| C                 | 0.733395 | -0.670861 | -0.850115 | C | -0.733395 | -0.670861 | -0.850115 |
| C                 | 1.651971 | -1.339366 | -1.662776 | H | -2.897699 | 0.975239  | 1.228512  |
| H                 | 3.745599 | -1.641978 | -2.077028 | H | -3.745599 | -1.641979 | -2.077028 |
| H                 | 2.897698 | 0.975239  | 1.228513  | H | -1.320319 | -1.989349 | -2.466840 |
| H                 | 1.320319 | -1.989349 | -2.466840 | C | 5.539871  | 1.074709  | -0.177064 |
| C                 | 0.000000 | 0.791758  | 0.937468  | C | 5.776603  | -1.167712 | 0.073062  |

|   |           |           |           |                   |            |           |           |
|---|-----------|-----------|-----------|-------------------|------------|-----------|-----------|
| C | 5.055140  | 2.365305  | -0.412471 | H                 | 0.000000   | -0.708340 | 2.535805  |
| C | 6.913959  | 0.834070  | 0.085159  | H                 | 0.884758   | 0.776318  | 2.934906  |
| C | 5.563779  | -2.544750 | 0.193299  | H                 | -0.884759  | 0.776318  | 2.934906  |
| C | 7.064643  | -0.597235 | 0.247164  | C                 | 0.000000   | 2.332833  | 0.815210  |
| C | 5.966222  | 3.418740  | -0.364593 | H                 | 0.884901   | 2.756617  | 1.300507  |
| H | 4.007285  | 2.543330  | -0.626766 | H                 | 0.000000   | 2.645467  | -0.232954 |
| C | 7.808605  | 1.911134  | 0.128068  | H                 | -0.884901  | 2.756617  | 1.300507  |
| C | 6.666602  | -3.348633 | 0.475421  |                   |            |           |           |
| H | 4.575612  | -2.974399 | 0.073338  |                   |            |           |           |
| C | 8.156372  | -1.428204 | 0.529761  | <b>Compound 5</b> |            |           |           |
| C | 7.329057  | 3.199273  | -0.094327 | C                 | 1.162264   | 1.456762  | -0.911301 |
| H | 5.613085  | 4.430170  | -0.542523 | C                 | 0.722929   | 0.168359  | -0.544996 |
| H | 8.862772  | 1.741853  | 0.328171  | C                 | 1.687113   | -0.793453 | -0.177471 |
| C | 7.951803  | -2.801057 | 0.639746  | C                 | 3.035388   | -0.465480 | -0.182336 |
| H | 6.526778  | -4.421255 | 0.571736  | C                 | 3.455447   | 0.829280  | -0.547624 |
| H | 9.147962  | -1.005763 | 0.664807  | C                 | 2.514547   | 1.794600  | -0.913565 |
| N | 4.856271  | -0.145787 | -0.183760 | H                 | 0.432258   | 2.197468  | -1.222111 |
| C | -5.776603 | -1.167712 | 0.073063  | H                 | 1.364531   | -1.783498 | 0.131631  |
| C | -5.539871 | 1.074709  | -0.177065 | H                 | 2.823001   | 2.793900  | -1.207074 |
| C | -5.563778 | -2.544750 | 0.193300  | C                 | 4.231465   | -1.346838 | 0.180604  |
| C | -7.064643 | -0.597235 | 0.247165  | C                 | 5.389198   | -0.371864 | -0.033449 |
| C | -5.055141 | 2.365304  | -0.412475 | C                 | 6.748176   | -0.591014 | 0.148647  |
| C | -6.913959 | 0.834070  | 0.085158  | C                 | 7.647935   | 0.456089  | -0.109388 |
| C | -6.666601 | -3.348633 | 0.475424  | C                 | 7.179426   | 1.707696  | -0.536213 |
| H | -4.575612 | -2.974399 | 0.073339  | C                 | 5.812696   | 1.932219  | -0.701577 |
| C | -8.156372 | -1.428204 | 0.529763  | C                 | 4.917288   | 0.888686  | -0.454338 |
| C | -5.966223 | 3.418740  | -0.364597 | H                 | 7.126470   | -1.548403 | 0.493494  |
| H | -4.007286 | 2.543330  | -0.626770 | H                 | 7.893008   | 2.497656  | -0.745168 |
| C | -7.808606 | 1.911133  | 0.128066  | H                 | 5.461264   | 2.905592  | -1.030465 |
| C | -7.951802 | -2.801057 | 0.639749  | C                 | -9.813154  | 0.730209  | -0.577744 |
| H | -6.526776 | -4.421255 | 0.571740  | C                 | -9.884550  | -0.980841 | 0.909136  |
| H | -9.147961 | -1.005763 | 0.664809  | C                 | -9.425958  | 1.678486  | -1.530007 |
| C | -7.329057 | 3.199272  | -0.094330 | C                 | -11.159949 | 0.621514  | -0.142412 |
| H | -5.613086 | 4.430169  | -0.542527 | C                 | -9.571506  | -2.036273 | 1.771729  |
| H | -8.862772 | 1.741853  | 0.328171  | C                 | -11.205003 | -0.469461 | 0.809150  |
| N | -4.856272 | -0.145787 | -0.183760 | C                 | -10.407486 | 2.531043  | -2.031836 |
| H | 8.789606  | -3.456327 | 0.857097  | H                 | -8.398585  | 1.748900  | -1.869431 |
| H | 8.011697  | 4.042784  | -0.062612 | C                 | -12.126775 | 1.491690  | -0.662607 |
| H | -8.011698 | 4.042783  | -0.062615 | C                 | -10.606761 | -2.585673 | 2.525641  |
| H | -8.789604 | -3.456327 | 0.857101  | H                 | -8.558853  | -2.415150 | 1.853646  |
| C | 0.000000  | 0.379892  | 2.426829  | C                 | -12.227312 | -1.040719 | 1.577962  |
|   |           |           |           | C                 | -11.744531 | 2.444277  | -1.603473 |

|   |            |           |           |                   |            |           |           |
|---|------------|-----------|-----------|-------------------|------------|-----------|-----------|
| H | -10.130918 | 3.276693  | -2.771365 | H                 | -5.461267  | -2.905606 | -1.030447 |
| H | -13.161190 | 1.420258  | -0.338776 | H                 | -0.432250  | -2.197463 | -1.222106 |
| C | -11.922931 | -2.098341 | 2.430891  | H                 | -7.893004  | -2.497659 | -0.745192 |
| H | -10.388871 | -3.407311 | 3.201527  | H                 | 12.706209  | 2.550822  | 3.031142  |
| H | -13.242606 | -0.660264 | 1.511499  | H                 | 12.483814  | -3.125373 | -2.013533 |
| N | -9.045790  | -0.246615 | 0.064615  | H                 | -12.483803 | 3.125299  | -2.013675 |
| C | 9.884546   | 0.980873  | 0.909110  | H                 | -12.706230 | -2.550703 | 3.031216  |
| C | 9.813159   | -0.730237 | -0.577700 | C                 | 4.340879   | -2.565012 | -0.764325 |
| C | 9.571496   | 2.036347  | 1.771651  | H                 | 4.393985   | -2.249876 | -1.810432 |
| C | 11.205003  | 0.469499  | 0.809139  | H                 | 5.237172   | -3.150620 | -0.535578 |
| C | 9.425963   | -1.678558 | -1.529920 | H                 | 3.471796   | -3.220184 | -0.647319 |
| C | 11.159955  | -0.621514 | -0.142375 | C                 | 4.159278   | -1.824149 | 1.648716  |
| C | 10.606744  | 2.585782  | 2.525543  | H                 | 4.082026   | -0.976999 | 2.336285  |
| H | 8.558839   | 2.415222  | 1.853537  | H                 | 3.287936   | -2.469288 | 1.799914  |
| C | 12.227306  | 1.040794  | 1.577934  | H                 | 5.052824   | -2.399533 | 1.911318  |
| C | 10.407491  | -2.531129 | -2.031720 | C                 | -4.159270  | 1.824106  | 1.648763  |
| H | 8.398586   | -1.748988 | -1.869328 | H                 | -4.082014  | 0.976943  | 2.336314  |
| C | 12.126783  | -1.491705 | -0.662544 | H                 | -3.287926  | 2.469241  | 1.799966  |
| C | 11.922915  | 2.098445  | 2.430821  | H                 | -5.052813  | 2.399487  | 1.911382  |
| H | 10.388855  | 3.407455  | 3.201386  | C                 | -4.340890  | 2.565012  | -0.764263 |
| H | 13.242604  | 0.660346  | 1.511491  | H                 | -4.393997  | 2.249898  | -1.810377 |
| C | 11.744537  | -2.444341 | -1.603359 | H                 | -5.237187  | 3.150609  | -0.535501 |
| H | 10.130927  | -3.276818 | -2.771211 | H                 | -3.471812  | 3.220189  | -0.647247 |
| H | 13.161202  | -1.420256 | -0.338730 |                   |            |           |           |
| N | 9.045790   | 0.246608  | 0.064617  |                   |            |           |           |
| C | -4.231466  | 1.346822  | 0.180640  | <b>Compound 7</b> |            |           |           |
| C | -3.035389  | 0.465472  | -0.182315 | C                 | -5.448520  | -0.969768 | -1.654329 |
| C | -5.389196  | 0.371847  | -0.033421 | C                 | -4.939749  | 0.024797  | -0.794550 |
| C | -1.687116  | 0.793451  | -0.177456 | C                 | -5.843056  | 0.737852  | 0.021090  |
| C | -3.455443  | -0.829290 | -0.547605 | C                 | -7.201176  | 0.457837  | -0.033633 |
| C | -6.748173  | 0.590996  | 0.148675  | C                 | -7.691123  | -0.540781 | -0.899100 |
| C | -4.917283  | -0.888701 | -0.454318 | C                 | -6.810930  | -1.258383 | -1.712228 |
| C | -0.722928  | -0.168353 | -0.544996 | H                 | -4.766320  | -1.506854 | -2.305711 |
| H | -1.364538  | 1.783495  | 0.131656  | H                 | -5.464136  | 1.489051  | 0.708084  |
| C | -2.514539  | -1.794603 | -0.913551 | H                 | -7.174656  | -2.025251 | -2.390135 |
| C | -7.647936  | -0.456100 | -0.109378 | C                 | -8.339360  | 1.098073  | 0.762481  |
| H | -7.126463  | 1.548380  | 0.493540  | C                 | -9.544716  | 0.329232  | 0.220669  |
| C | -5.812693  | -1.932230 | -0.701563 | C                 | -10.881618 | 0.458905  | 0.572676  |
| C | -1.162258  | -1.456757 | -0.911297 | C                 | -11.835083 | -0.356033 | -0.059535 |
| H | -2.822988  | -2.793908 | -1.207055 | C                 | -11.440316 | -1.293331 | -1.026040 |
| C | -7.179425  | -1.707702 | -0.536214 | C                 | -10.094748 | -1.436687 | -1.364222 |
|   |            |           |           | C                 | -9.146558  | -0.620151 | -0.743033 |

|   |            |           |           |   |            |           |           |
|---|------------|-----------|-----------|---|------------|-----------|-----------|
| H | -11.201607 | 1.167779  | 1.330197  | C | -0.000002  | -1.400227 | -0.974569 |
| H | -12.194501 | -1.901007 | -1.514671 | C | -1.180836  | -0.435957 | -0.852550 |
| H | -9.800798  | -2.167641 | -2.111539 | C | 1.180819   | -0.435942 | -0.852540 |
| C | 14.032599  | -1.259562 | 0.758610  | C | -2.538102  | -0.721512 | -0.890944 |
| C | 13.971398  | 0.940391  | 0.209716  | C | -0.732728  | 0.888491  | -0.671139 |
| C | 13.716962  | -2.595454 | 1.026586  | C | 2.538090   | -0.721477 | -0.890919 |
| C | 15.333783  | -0.742466 | 0.992201  | C | 0.732693   | 0.888501  | -0.671134 |
| C | 13.598223  | 2.214002  | -0.231543 | C | -3.484625  | 0.315148  | -0.750542 |
| C | 15.295186  | 0.661743  | 0.639776  | H | -2.880475  | -1.746183 | -1.005011 |
| C | 14.731016  | -3.414787 | 1.518851  | C | -1.656389  | 1.926887  | -0.527927 |
| H | 12.718082  | -2.982537 | 0.859464  | C | 3.484594   | 0.315198  | -0.750503 |
| C | 16.335165  | -1.588151 | 1.486773  | H | 2.880483   | -1.746141 | -1.004987 |
| C | 14.568844  | 3.213899  | -0.220680 | C | 1.656336   | 1.926911  | -0.527908 |
| H | 12.589448  | 2.418629  | -0.572249 | C | -3.018477  | 1.632958  | -0.569468 |
| C | 16.251444  | 1.685414  | 0.641299  | H | -1.327605  | 2.953821  | -0.396147 |
| C | 16.028795  | -2.921643 | 1.745169  | C | 3.018428   | 1.633001  | -0.569431 |
| H | 14.510586  | -4.456354 | 1.733172  | H | 1.327531   | 2.953839  | -0.396131 |
| H | 17.335604  | -1.206480 | 1.669730  | H | -3.736730  | 2.442626  | -0.486142 |
| C | 15.882161  | 2.957848  | 0.213280  | H | 3.736674   | 2.442675  | -0.486091 |
| H | 14.302544  | 4.211506  | -0.557214 | C | 8.339287   | 1.098119  | 0.762665  |
| H | 17.268027  | 1.486865  | 0.968539  | C | 7.201124   | 0.457899  | -0.033495 |
| N | 13.211458  | -0.231515 | 0.283744  | C | 9.544659   | 0.329293  | 0.220864  |
| C | -14.032528 | -1.259532 | 0.758744  | C | 5.843000   | 0.737903  | 0.021199  |
| C | -13.971460 | 0.940310  | 0.209411  | C | 7.691097   | -0.540689 | -0.898981 |
| C | -13.716831 | -2.595383 | 1.026850  | C | 10.881549  | 0.458954  | 0.572922  |
| C | -15.333653 | -0.742386 | 0.992569  | C | 9.146528   | -0.620065 | -0.742871 |
| C | -13.598365 | 2.213838  | -0.232156 | C | 4.939724   | 0.024864  | -0.794489 |
| C | -15.295142 | 0.661754  | 0.639860  | H | 5.464048   | 1.489078  | 0.708202  |
| C | -14.730764 | -3.414628 | 1.519506  | C | 6.810935   | -1.258270 | -1.712160 |
| H | -12.717994 | -2.982492 | 0.859527  | C | 11.835041  | -0.355968 | -0.059271 |
| C | -16.334916 | -1.587989 | 1.487523  | H | 11.201501  | 1.167795  | 1.330488  |
| C | -14.568967 | 3.213752  | -0.221230 | C | 10.094743  | -1.436590 | -1.364038 |
| H | -12.589664 | 2.418379  | -0.573132 | C | 5.448521   | -0.969667 | -1.654289 |
| C | -16.251384 | 1.685441  | 0.641428  | H | 7.174691   | -2.025112 | -2.390080 |
| C | -16.028485 | -2.921439 | 1.746066  | C | 11.440297  | -1.293248 | -1.025808 |
| H | -14.510290 | -4.456162 | 1.733940  | H | 9.800822   | -2.167529 | -2.111382 |
| H | -17.335310 | -1.206289 | 1.670663  | H | 4.766337   | -1.506734 | -2.305704 |
| C | -15.882183 | 2.957792  | 0.213091  | H | 12.194485  | -1.900921 | -1.514434 |
| H | -14.302738 | 4.211300  | -0.557997 | H | 16.795937  | -3.587783 | 2.127693  |
| H | -17.267890 | 1.486971  | 0.968955  | H | 16.613369  | 3.760274  | 0.210678  |
| N | -13.211524 | -0.231590 | 0.283422  | H | -16.795536 | -3.587514 | 2.128885  |

|   |            |           |           |   |           |           |           |
|---|------------|-----------|-----------|---|-----------|-----------|-----------|
| H | -16.613385 | 3.760225  | 0.210514  | C | 3.461319  | 0.110245  | -0.337621 |
| C | 8.163477   | 0.873019  | 2.281584  | C | 3.019150  | 0.894310  | -1.414544 |
| H | 7.261114   | 1.377134  | 2.641890  | C | 1.655449  | 1.071735  | -1.647995 |
| H | 8.078476   | -0.191955 | 2.515999  | C | 0.734032  | 0.442066  | -0.806995 |
| H | 9.018045   | 1.279080  | 2.832292  | H | 2.892700  | -1.106356 | 1.354838  |
| C | 8.456649   | 2.610197  | 0.465394  | H | 3.750165  | 1.355261  | -2.071144 |
| H | 9.315490   | 3.040395  | 0.990624  | H | 1.326294  | 1.683901  | -2.482867 |
| H | 8.581559   | 2.793900  | -0.605635 | C | -5.537678 | -1.265674 | -0.011877 |
| H | 7.558217   | 3.137425  | 0.801665  | C | -5.771123 | 0.982647  | 0.130551  |
| C | 0.000004   | -2.438199 | 0.170674  | C | -5.063493 | -2.569022 | -0.185073 |
| H | 0.000002   | -1.947173 | 1.148143  | C | -6.903207 | -1.015175 | 0.278259  |
| H | -0.884980  | -3.079839 | 0.109381  | C | -5.565239 | 2.364295  | 0.178210  |
| H | 0.884997   | -3.079827 | 0.109380  | C | -7.051513 | 0.423326  | 0.373664  |
| C | 0.000008   | -2.123415 | -2.339973 | C | -5.970066 | -3.614925 | -0.044906 |
| H | 0.000010   | -1.406625 | -3.166283 | H | -4.024257 | -2.766097 | -0.425761 |
| H | 0.885233   | -2.760013 | -2.438234 | C | -7.793591 | -2.084587 | 0.414852  |
| H | -0.885214  | -2.760017 | -2.438243 | C | -6.661390 | 3.177536  | 0.448901  |
| C | -8.163589  | 0.873012  | 2.281410  | H | -4.582236 | 2.795345  | 0.021527  |
| H | -8.078608  | -0.191956 | 2.515856  | C | -8.136057 | 1.262886  | 0.645211  |
| H | -7.261229  | 1.377124  | 2.641726  | C | -7.337212 | -3.400013 | 0.254656  |
| H | -9.018165  | 1.279099  | 2.832088  | H | -5.619897 | -4.633811 | -0.183181 |
| C | -8.456721  | 2.610144  | 0.465169  | H | -8.833693 | -1.897322 | 0.665844  |
| H | -8.581619  | 2.793817  | -0.605867 | C | -7.956447 | 2.651794  | 0.676790  |
| H | -9.315568  | 3.040354  | 0.990377  | H | -6.512173 | 4.251427  | 0.509259  |
| H | -7.558294  | 3.137382  | 0.801435  | H | -9.122173 | 0.842245  | 0.822721  |

**Compound BPCF**

|   |           |           |           |   |           |           |           |
|---|-----------|-----------|-----------|---|-----------|-----------|-----------|
| H | -0.000090 | -2.017292 | 1.032237  | N | -4.857217 | -0.048664 | -0.104003 |
| C | -3.018960 | 0.894256  | -1.415033 | C | 5.771130  | 0.982650  | 0.131220  |
| C | -3.461310 | 0.110195  | -0.338173 | C | 5.537656  | -1.265665 | -0.011278 |
| C | -2.538657 | -0.516638 | 0.514125  | C | 5.565280  | 2.364304  | 0.178959  |
| C | -1.182088 | -0.354826 | 0.268254  | C | 7.051541  | 0.423303  | 0.374182  |
| C | -0.733936 | 0.442066  | -0.807110 | C | 5.063446  | -2.569001 | -0.184483 |
| C | -1.655227 | 1.071705  | -1.648271 | C | 6.903218  | -1.015182 | 0.278718  |
| H | -3.749886 | 1.355183  | -2.071751 | C | 6.661479  | 3.177515  | 0.449523  |
| H | -2.892931 | -1.106377 | 1.354387  | H | 4.582265  | 2.795379  | 0.022421  |
| H | -1.325953 | 1.683857  | -2.483106 | C | 8.136134  | 1.262837  | 0.645616  |
| C | -0.000093 | -0.919110 | 1.029053  | C | 5.970035  | -3.614915 | -0.044499 |
| H | -0.000177 | -0.607888 | 2.082185  | H | 4.024184  | -2.766058 | -0.425078 |
| C | 1.182020  | -0.354816 | 0.268445  | C | 7.793612  | -2.084608 | 0.415167  |
| C | 2.538555  | -0.516616 | 0.514525  | C | 7.956560  | 2.651748  | 0.677256  |
|   |           |           |           | H | 6.512285  | 4.251406  | 0.509939  |
|   |           |           |           | H | 9.122262  | 0.842172  | 0.823004  |

|   |            |           |           |   |            |           |           |
|---|------------|-----------|-----------|---|------------|-----------|-----------|
| C | 7.337215   | -3.400018 | 0.254901  | C | -12.027005 | -5.050045 | -1.501210 |
| H | 5.619849   | -4.633792 | -0.182792 | C | -12.412465 | -7.128106 | -0.223979 |
| H | 8.833733   | -1.897364 | 0.666089  | C | -10.728853 | -7.949230 | 1.335326  |
| N | 4.857187   | -0.048647 | -0.103224 | H | -11.482781 | -3.239881 | -2.574891 |
| C | -9.100886  | 3.543959  | 1.014938  | C | -13.279828 | -5.221344 | -2.114259 |
| C | -9.486003  | 4.645777  | 0.204355  | C | -13.658442 | -7.257109 | -0.860437 |
| C | -9.825796  | 3.282590  | 2.189170  | C | -11.942772 | -8.090355 | 0.734904  |
| C | -10.569016 | 5.484373  | 0.627062  | H | -10.381007 | -8.685517 | 2.055712  |
| C | -8.859026  | 4.945718  | -1.057385 | C | -14.085558 | -6.312760 | -1.793403 |
| C | -10.884083 | 4.085729  | 2.596951  | H | -13.614857 | -4.490723 | -2.846215 |
| H | -9.527457  | 2.441284  | 2.808307  | H | -14.289973 | -8.107996 | -0.617555 |
| C | -10.963526 | 6.608231  | -0.164670 | H | -12.579160 | -8.940145 | 0.968945  |
| C | -11.269247 | 5.202671  | 1.840451  | H | -15.052141 | -6.430166 | -2.275546 |
| C | -9.240119  | 6.013189  | -1.813460 | C | 9.101061   | 3.543870  | 1.015259  |
| H | -8.070697  | 4.293011  | -1.414654 | C | 9.486030   | 4.645757  | 0.204697  |
| H | -11.411662 | 3.859827  | 3.520222  | C | 9.826205   | 3.282412  | 2.189331  |
| C | -10.293724 | 6.892806  | -1.393591 | C | 10.569126  | 5.484319  | 0.627261  |
| C | -12.034342 | 7.453228  | 0.266313  | C | 8.858820   | 4.945796  | -1.056902 |
| C | -12.342797 | 6.066905  | 2.247524  | C | 10.884572  | 4.085514  | 2.596972  |
| H | -8.750105  | 6.210418  | -2.763821 | H | 9.527985   | 2.441066  | 2.808471  |
| C | -10.693604 | 8.004563  | -2.154377 | C | 10.963487  | 6.608240  | -0.164456 |
| C | -12.398130 | 8.555145  | -0.525900 | C | 11.269592  | 5.202521  | 1.840491  |
| C | -12.706833 | 7.144296  | 1.498617  | C | 9.239779   | 6.013320  | -1.812971 |
| H | -12.861891 | 5.839978  | 3.175455  | H | 8.070422   | 4.293123  | -1.414083 |
| C | -11.733172 | 8.826242  | -1.721411 | H | 11.412335  | 3.859523  | 3.520116  |
| H | -10.182286 | 8.217379  | -3.089829 | C | 10.293459  | 6.892908  | -1.393233 |
| H | -13.210326 | 9.198035  | -0.195931 | C | 12.034380  | 7.453206  | 0.266396  |
| H | -13.519701 | 7.790489  | 1.820344  | C | 12.343211  | 6.066726  | 2.247436  |
| H | -12.029510 | 9.682607  | -2.320878 | H | 8.749596   | 6.210605  | -2.763234 |
| C | -8.236518  | -4.569767 | 0.460843  | C | 10.693196  | 8.004726  | -2.154006 |
| C | -9.485213  | -4.716477 | -0.202195 | C | 12.398019  | 8.555185  | -0.525800 |
| C | -7.828369  | -5.568072 | 1.361122  | C | 12.707100  | 7.144182  | 1.498550  |
| C | -10.312087 | -5.848140 | 0.100492  | H | 12.862480  | 5.839724  | 3.175251  |
| C | -9.953551  | -3.794473 | -1.204958 | C | 11.732841  | 8.826373  | -1.721168 |
| C | -8.620393  | -6.672908 | 1.647576  | H | 10.181705  | 8.217614  | -3.089348 |
| H | -6.874503  | -5.452863 | 1.868029  | H | 13.210276  | 9.198052  | -0.195934 |
| C | -11.581363 | -6.007239 | -0.539491 | H | 13.520020  | 7.790356  | 1.820187  |
| C | -9.875291  | -6.831496 | 1.040728  | H | 12.029066  | 9.682788  | -2.320620 |
| C | -11.160076 | -3.950989 | -1.818309 | C | 8.236569   | -4.569784 | 0.460894  |
| H | -9.317142  | -2.962438 | -1.483375 | C | 9.485141   | -4.716475 | -0.202385 |
| H | -8.276369  | -7.416828 | 2.361775  | C | 7.828562   | -5.568121 | 1.361195  |

|   |           |           |           |
|---|-----------|-----------|-----------|
| C | 10.312073 | -5.848144 | 0.100138  |
| C | 9.953296  | -3.794478 | -1.205247 |
| C | 8.620634  | -6.672966 | 1.647478  |
| H | 6.874779  | -5.452922 | 1.868261  |
| C | 11.581248 | -6.007227 | -0.540052 |
| C | 9.875431  | -6.831527 | 1.040420  |
| C | 11.159724 | -3.950977 | -1.818790 |
| H | 9.316820  | -2.962471 | -1.483584 |
| H | 8.276737  | -7.416913 | 2.361712  |
| C | 12.026727 | -5.050013 | -1.501825 |
| C | 12.412410 | -7.128093 | -0.224697 |
| C | 10.729043 | -7.949271 | 1.334843  |
| H | 11.482297 | -3.239877 | -2.575435 |
| C | 13.279458 | -5.221282 | -2.115069 |
| C | 13.658291 | -7.257067 | -0.861346 |
| C | 11.942869 | -8.090371 | 0.734229  |
| H | 10.381313 | -8.685586 | 2.055256  |
| C | 14.085254 | -6.312692 | -1.794355 |
| H | 13.614363 | -4.490645 | -2.847067 |
| H | 14.289867 | -8.107952 | -0.618573 |
| H | 12.579291 | -8.940172 | 0.968140  |
| H | 15.051763 | -6.430074 | -2.276652 |

**Compound BPCF2**

|   |           |           |           |
|---|-----------|-----------|-----------|
| H | -4.243050 | -2.067540 | -1.584576 |
| C | -1.218304 | -0.255147 | 1.751659  |
| C | -0.733107 | -0.691710 | 0.501418  |
| C | -1.661492 | -0.969893 | -0.522857 |
| C | -3.020148 | -0.807996 | -0.290484 |
| C | -3.488031 | -0.363255 | 0.964119  |
| C | -2.580984 | -0.087770 | 1.990540  |
| H | -0.514136 | -0.065239 | 2.556212  |
| H | -1.307848 | -1.284447 | -1.501126 |
| H | -2.923453 | 0.245814  | 2.966543  |
| C | -4.187595 | -1.028686 | -1.232325 |
| H | -4.117459 | -0.402409 | -2.131805 |
| C | -5.380924 | -0.658397 | -0.374596 |
| C | -6.729425 | -0.645811 | -0.705223 |
| C | -7.662143 | -0.256123 | 0.269044  |
| C | -7.238271 | 0.120092  | 1.552964  |
| C | -5.882107 | 0.123704  | 1.877773  |

|   |            |           |           |
|---|------------|-----------|-----------|
| C | -4.950757  | -0.270036 | 0.913043  |
| H | -7.070020  | -0.918225 | -1.699934 |
| H | -7.978905  | 0.401235  | 2.294958  |
| H | -5.566010  | 0.420583  | 2.873845  |
| C | 9.624878   | 1.112209  | -0.214795 |
| C | 10.039607  | -0.976332 | 0.556269  |
| C | 9.044676   | 2.273232  | -0.733703 |
| C | 11.014542  | 1.048393  | 0.062058  |
| C | 9.946200   | -2.296978 | 1.004792  |
| C | 11.278574  | -0.285896 | 0.561662  |
| C | 9.871282   | 3.369916  | -0.956474 |
| H | 7.985655   | 2.322655  | -0.963640 |
| C | 11.823013  | 2.165300  | -0.170283 |
| C | 11.111379  | -2.921651 | 1.438984  |
| H | 8.996592   | -2.820864 | 1.026144  |
| C | 12.433578  | -0.934981 | 1.008386  |
| C | 11.260726  | 3.341187  | -0.685180 |
| H | 9.438399   | 4.277104  | -1.368211 |
| H | 12.883036  | 2.127619  | 0.064150  |
| C | 12.365459  | -2.264269 | 1.444363  |
| H | 11.051899  | -3.941490 | 1.807353  |
| H | 13.387727  | -0.414837 | 1.009904  |
| N | 9.039988   | -0.120760 | 0.085100  |
| C | -9.894369  | 0.872744  | 0.039535  |
| C | -9.805499  | -1.325988 | -0.493702 |
| C | -9.600335  | 2.188358  | 0.409226  |
| C | -11.203283 | 0.496857  | -0.356588 |
| C | -9.417931  | -2.650426 | -0.715475 |
| C | -11.147926 | -0.912018 | -0.691659 |
| C | -10.637955 | 3.115122  | 0.399025  |
| H | -8.595006  | 2.486205  | 0.687425  |
| C | -12.227541 | 1.448926  | -0.361124 |
| C | -10.388701 | -3.548764 | -1.147641 |
| H | -8.396242  | -2.976310 | -0.551397 |
| C | -12.103792 | -1.835078 | -1.126423 |
| C | -11.959424 | 2.767915  | 0.026733  |
| H | -10.421329 | 4.145196  | 0.665954  |
| H | -13.235413 | 1.167300  | -0.654072 |
| C | -11.736153 | -3.167662 | -1.356593 |
| H | -10.106793 | -4.584343 | -1.315296 |
| H | -13.127837 | -1.516932 | -1.299869 |



|   |           |           |           |   |            |           |           |
|---|-----------|-----------|-----------|---|------------|-----------|-----------|
| N | -9.051321 | -0.237923 | -0.047657 | H | 15.268972  | 2.584044  | -3.608403 |
| C | 13.585960 | -2.940190 | 1.968261  | C | 16.922542  | 4.718314  | -3.888363 |
| C | 14.053450 | -4.183970 | 1.465484  | C | 17.197808  | 7.057824  | -3.330733 |
| C | 14.300600 | -2.317536 | 3.004365  | C | 15.500859  | 8.228225  | -1.939801 |
| C | 15.212196 | -4.788749 | 2.053673  | H | 13.962924  | 9.099116  | -0.750946 |
| C | 13.435563 | -4.859364 | 0.353358  | C | 17.653035  | 5.903051  | -3.966358 |
| C | 15.429542 | -2.895893 | 3.572407  | H | 17.278863  | 3.822251  | -4.390242 |
| H | 13.939352 | -1.367271 | 3.387364  | H | 17.770391  | 7.979440  | -3.398773 |
| C | 15.694758 | -6.045221 | 1.570216  | H | 16.078170  | 9.146341  | -2.015025 |
| C | 15.900889 | -4.138791 | 3.123811  | H | 18.582427  | 5.927947  | -4.528623 |
| C | 13.900416 | -6.053308 | -0.110155 | C | -13.038982 | 3.794028  | -0.018838 |
| H | 12.584906 | -4.393084 | -0.130806 | C | -13.371908 | 4.610263  | 1.095712  |
| H | 15.948188 | -2.390645 | 4.383300  | C | -13.752976 | 3.960687  | -1.216577 |
| C | 15.036380 | -6.698806 | 0.484255  | C | -14.391529 | 5.608049  | 0.956137  |
| C | 16.843237 | -6.654210 | 2.167289  | C | -12.754166 | 4.458998  | 2.388155  |
| C | 17.052340 | -4.773405 | 3.704091  | C | -14.749839 | 4.919470  | -1.353449 |
| H | 13.415041 | -6.535992 | -0.954943 | H | -13.494399 | 3.336266  | -2.067096 |
| C | 15.525259 | -7.933842 | 0.025547  | C | -14.732940 | 6.450666  | 2.060157  |
| C | 17.294686 | -7.891127 | 1.677058  | C | -15.081116 | 5.766667  | -0.285388 |
| C | 17.501445 | -5.976246 | 3.250616  | C | -13.084987 | 5.258384  | 3.440661  |
| H | 17.561676 | -4.267242 | 4.520440  | H | -12.014844 | 3.677712  | 2.522684  |
| C | 16.641238 | -8.521974 | 0.618798  | H | -15.270702 | 5.029015  | -2.301360 |
| H | 15.022146 | -8.427785 | -0.801917 | C | -14.073608 | 6.291610  | 3.317118  |
| H | 18.166296 | -8.353921 | 2.133047  | C | -15.740099 | 7.456177  | 1.914963  |
| H | 18.373275 | -6.444715 | 3.700458  | C | -16.089925 | 6.783560  | -0.401937 |
| H | 17.006158 | -9.477724 | 0.252867  | H | -12.604035 | 5.116094  | 4.405367  |
| C | 12.075468 | 4.571130  | -0.893085 | C | -14.420850 | 7.132342  | 4.388197  |
| C | 13.276422 | 4.585874  | -1.653154 | C | -16.052540 | 8.275414  | 3.012855  |
| C | 11.633214 | 5.767823  | -0.305094 | C | -16.403181 | 7.593434  | 0.646908  |
| C | 14.024952 | 5.804150  | -1.759938 | H | -16.601581 | 6.893272  | -1.354935 |
| C | 13.767761 | 3.433719  | -2.364634 | C | -15.398344 | 8.114171  | 4.233914  |
| C | 12.348968 | 6.953486  | -0.416005 | H | -13.917472 | 7.007410  | 5.343616  |
| H | 10.715878 | 5.753384  | 0.276670  | H | -16.816286 | 9.040869  | 2.900506  |
| C | 15.245255 | 5.838966  | -2.505205 | H | -17.167498 | 8.359589  | 0.543268  |
| C | 13.557044 | 6.997284  | -1.127945 | H | -15.654458 | 8.756966  | 5.071613  |
| C | 14.927568 | 3.469998  | -3.078556 | C | -12.714262 | -4.169001 | -1.866979 |
| H | 13.186348 | 2.519453  | -2.337184 | C | -13.961211 | -4.423144 | -1.233974 |
| H | 11.981681 | 7.856097  | 0.065867  | C | -12.386425 | -4.888858 | -3.027696 |
| C | 15.718619 | 4.664419  | -3.165729 | C | -14.866654 | -5.367970 | -1.819721 |
| C | 15.998694 | 7.051539  | -2.598410 | C | -14.352628 | -3.799997 | 0.004450  |
| C | 14.332525 | 8.201739  | -1.241001 | C | -13.255831 | -5.814122 | -3.592306 |

|   |            |           |           |
|---|------------|-----------|-----------|
| H | -11.433164 | -4.691906 | -3.510124 |
| C | -16.134339 | -5.627227 | -1.210036 |
| C | -14.510056 | -6.064284 | -3.015474 |
| C | -15.558098 | -4.052332 | 0.586923  |
| H | -13.658185 | -3.122142 | 0.487132  |
| H | -12.972472 | -6.340942 | -4.500066 |
| C | -16.500902 | -4.960771 | -0.001199 |
| C | -17.043146 | -6.558719 | -1.804143 |
| C | -15.441181 | -6.996964 | -3.588354 |
| H | -15.821879 | -3.569169 | 1.524572  |
| C | -17.753176 | -5.225427 | 0.578768  |
| C | -18.285372 | -6.790309 | -1.189730 |
| C | -16.652839 | -7.231360 | -3.012997 |
| H | -15.154418 | -7.515100 | -4.500145 |
| C | -18.634585 | -6.129129 | -0.012616 |
| H | -18.028097 | -4.716580 | 1.499275  |
| H | -18.975812 | -7.496495 | -1.644070 |
| H | -17.348043 | -7.938242 | -3.458994 |
| H | -19.599522 | -6.321856 | 0.448109  |
| C | 4.161578   | 0.722459  | 1.148194  |
| C | 3.004518   | -0.109718 | 0.632532  |
| H | 4.083991   | 1.773877  | 0.840262  |
| C | 5.363218   | 0.039296  | 0.528036  |
| C | 1.644731   | 0.043067  | 0.861602  |
| C | 3.484189   | -1.148994 | -0.192557 |
| C | 6.709926   | 0.350470  | 0.654673  |
| C | 4.947290   | -1.059461 | -0.255386 |
| C | 0.725017   | -0.846375 | 0.268907  |
| H | 1.283240   | 0.863069  | 1.476350  |
| C | 2.585442   | -2.039175 | -0.786394 |
| C | 7.654531   | -0.433830 | -0.026366 |
| H | 7.042143   | 1.178608  | 1.273810  |
| C | 5.891527   | -1.843667 | -0.923881 |
| C | 1.220581   | -1.881009 | -0.551254 |
| H | 2.935996   | -2.851793 | -1.417223 |
| C | 7.244205   | -1.520622 | -0.813720 |
| H | 5.586602   | -2.688823 | -1.534612 |
| H | 0.523546   | -2.587506 | -0.992155 |
| H | 7.990038   | -2.102954 | -1.345507 |
| H | 4.211331   | 0.726321  | 2.245368  |

### Compound BPCF3

|   |            |           |           |
|---|------------|-----------|-----------|
| H | 8.175705   | -2.292714 | 0.459972  |
| C | 5.422942   | 0.316426  | -2.573270 |
| C | 4.837370   | -0.448249 | -1.543010 |
| C | 5.672986   | -0.980506 | -0.539708 |
| C | 7.040305   | -0.747159 | -0.579297 |
| C | 7.610381   | 0.020134  | -1.617198 |
| C | 6.795642   | 0.554049  | -2.619015 |
| H | 4.791939   | 0.710590  | -3.364544 |
| H | 5.238630   | -1.550928 | 0.277062  |
| H | 7.217474   | 1.141011  | -3.430687 |
| C | 8.118019   | -1.198351 | 0.386616  |
| H | 7.939183   | -0.830881 | 1.406057  |
| C | 9.374850   | -0.605998 | -0.218099 |
| C | 10.683789  | -0.673249 | 0.239414  |
| C | 11.694753  | -0.040528 | -0.501783 |
| C | 11.384775  | 0.655087  | -1.680842 |
| C | 10.066002  | 0.740081  | -2.126785 |
| C | 9.058007   | 0.104903  | -1.396307 |
| H | 10.933871  | -1.194016 | 1.159080  |
| H | 12.184049  | 1.120448  | -2.248839 |
| H | 9.838414   | 1.285459  | -3.038389 |
| C | -14.086802 | 1.730563  | -0.869034 |
| C | -14.124852 | -0.524011 | -1.073387 |
| C | -13.721126 | 3.078277  | -0.811092 |
| C | -15.413521 | 1.317514  | -0.583298 |
| C | -13.816200 | -1.866767 | -1.309546 |
| C | -15.438753 | -0.125157 | -0.718038 |
| C | -14.704239 | 4.005170  | -0.478548 |
| H | -12.704148 | 3.397404  | -1.013463 |
| C | -16.382423 | 2.269544  | -0.252576 |
| C | -14.833346 | -2.804787 | -1.163127 |
| H | -12.819832 | -2.173276 | -1.610006 |
| C | -16.442091 | -1.088241 | -0.575748 |
| C | -16.038789 | 3.626945  | -0.194639 |
| H | -14.435654 | 5.056127  | -0.420949 |
| H | -17.405512 | 1.959984  | -0.059147 |
| C | -16.150144 | -2.442233 | -0.787399 |
| H | -14.613555 | -3.848568 | -1.366052 |
| H | -17.448048 | -0.791577 | -0.291409 |
| N | -13.310339 | 0.607114  | -1.163007 |

|   |            |           |           |   |            |            |           |
|---|------------|-----------|-----------|---|------------|------------|-----------|
| C | 13.870981  | 0.992601  | 0.213671  | H | -19.801188 | -9.679649  | 1.563863  |
| C | 13.765977  | -1.269817 | 0.216752  | H | -21.105990 | -8.223776  | 0.042388  |
| C | 13.596185  | 2.360567  | 0.127144  | H | -17.764151 | -10.108919 | 2.909739  |
| C | 15.134444  | 0.526369  | 0.658067  | C | -17.057874 | 4.674832   | 0.093529  |
| C | 13.382963  | -2.607754 | 0.085670  | C | -17.899762 | 4.640727   | 1.237945  |
| C | 15.068877  | -0.921047 | 0.655938  | C | -17.196789 | 5.736290   | -0.815995 |
| C | 14.608852  | 3.252007  | 0.467562  | C | -18.897724 | 5.656113   | 1.406778  |
| H | 12.622532  | 2.723164  | -0.184522 | C | -17.776265 | 3.644980   | 2.271562  |
| C | 16.134253  | 1.443281  | 0.996063  | C | -18.153440 | 6.730245   | -0.649436 |
| C | 14.314647  | -3.586911 | 0.416277  | H | -16.553080 | 5.760052   | -1.690828 |
| H | 12.394324  | -2.881599 | -0.266855 | C | -19.770385 | 5.630007   | 2.539677  |
| C | 15.986359  | -1.924511 | 0.981323  | C | -19.028308 | 6.706801   | 0.447146  |
| C | 15.887464  | 2.818469  | 0.895083  | C | -18.603706 | 3.625546   | 3.353772  |
| H | 14.403071  | 4.317325  | 0.424064  | H | -16.992569 | 2.901073   | 2.186108  |
| H | 17.108062  | 1.092640  | 1.327092  | H | -18.240505 | 7.527272   | -1.383611 |
| C | 15.620205  | -3.271994 | 0.864220  | C | -19.640592 | 4.603263   | 3.524024  |
| H | 14.035999  | -4.631751 | 0.313361  | C | -20.777635 | 6.633539   | 2.697276  |
| H | 16.976609  | -1.660497 | 1.341431  | C | -20.046252 | 7.703943   | 0.632963  |
| N | 13.045086  | -0.103152 | -0.052492 | H | -18.481204 | 2.863281   | 4.119366  |
| C | -17.231926 | -3.461461 | -0.686354 | C | -20.511728 | 4.592077   | 4.626556  |
| C | -17.111557 | -4.643348 | 0.094396  | C | -21.627827 | 6.580825   | 3.814692  |
| C | -18.421223 | -3.243116 | -1.401491 | C | -20.885184 | 7.667893   | 1.704927  |
| C | -18.179920 | -5.599304 | 0.091427  | H | -20.133586 | 8.493998   | -0.108813 |
| C | -15.970364 | -4.917745 | 0.929599  | C | -21.495211 | 5.570119   | 4.766345  |
| C | -19.465904 | -4.159125 | -1.394382 | H | -20.409366 | 3.809492   | 5.374149  |
| H | -18.509822 | -2.341145 | -2.000322 | H | -22.394534 | 7.342589   | 3.931633  |
| C | -18.071494 | -6.806303 | 0.851282  | H | -21.652340 | 8.427881   | 1.830647  |
| C | -19.366215 | -5.354463 | -0.666759 | H | -22.161562 | 5.546566   | 5.624210  |
| C | -15.871085 | -6.065283 | 1.657386  | C | 16.937224  | 3.795237   | 1.299867  |
| H | -15.177310 | -4.180923 | 0.984715  | C | 17.369830  | 4.856189   | 0.458952  |
| H | -20.364992 | -3.960803 | -1.972446 | C | 17.520685  | 3.658618   | 2.570154  |
| C | -16.905448 | -7.060008 | 1.636035  | C | 18.352011  | 5.780879   | 0.943869  |
| C | -19.131132 | -7.767163 | 0.833334  | C | 16.893196  | 5.030473   | -0.889215 |
| C | -20.416754 | -6.334861 | -0.662248 | C | 18.481868  | 4.545507   | 3.039846  |
| H | -14.998138 | -6.240764 | 2.281401  | H | 17.186229  | 2.848156   | 3.211571  |
| C | -16.815173 | -8.255405 | 2.369318  | C | 18.790823  | 6.865488   | 0.121214  |
| C | -18.996126 | -8.949246 | 1.580732  | C | 18.907312  | 5.625002   | 2.251283  |
| C | -20.304242 | -7.489614 | 0.050446  | C | 17.316545  | 6.060919   | -1.673664 |
| H | -21.310488 | -6.133107 | -1.247537 | H | 16.187169  | 4.311032   | -1.287988 |
| C | -17.849808 | -9.189055 | 2.337865  | H | 18.899815  | 4.415544   | 4.034942  |
| H | -15.926225 | -8.444406 | 2.965880  | C | 18.267659  | 7.024901   | -1.198148 |

|   |           |           |           |   |            |           |           |
|---|-----------|-----------|-----------|---|------------|-----------|-----------|
| C | 19.760019 | 7.796097  | 0.612121  | C | -1.260354  | 0.155354  | -1.977714 |
| C | 19.881464 | 6.573083  | 2.717259  | C | 2.471562   | 0.321801  | -1.918535 |
| H | 16.941285 | 6.162786  | -2.689063 | C | 0.599091   | -1.155659 | -1.440558 |
| C | 18.708304 | 8.099983  | -1.988562 | C | -2.603535  | 0.470211  | -2.125143 |
| C | 20.169340 | 8.857111  | -0.213058 | C | -0.865206  | -1.113734 | -1.502555 |
| C | 20.287043 | 7.612606  | 1.936871  | C | 3.372167   | -0.684793 | -1.513294 |
| H | 20.290334 | 6.441078  | 3.715976  | H | 2.852208   | 1.289432  | -2.234756 |
| C | 19.647154 | 9.005935  | -1.497614 | C | 1.479431   | -2.163073 | -1.036353 |
| H | 18.308536 | 8.217088  | -2.992682 | C | -3.592057  | -0.482795 | -1.802546 |
| H | 20.903970 | 9.565174  | 0.162226  | H | -2.898091  | 1.459909  | -2.464096 |
| H | 21.023566 | 8.323343  | 2.303297  | C | -1.832846  | -2.069231 | -1.180352 |
| H | 19.976763 | 9.832504  | -2.121062 | C | 2.851414   | -1.920037 | -1.075961 |
| C | 16.548545 | -4.369087 | 1.257355  | H | 1.109355   | -3.128636 | -0.701619 |
| C | 17.867294 | -4.488852 | 0.741324  | C | -3.180367  | -1.747699 | -1.334068 |
| C | 16.096310 | -5.322573 | 2.184411  | H | -1.548521  | -3.055440 | -0.822753 |
| C | 18.713075 | -5.546067 | 1.213274  | H | 3.537174   | -2.710566 | -0.785380 |
| C | 18.393418 | -3.613833 | -0.274898 | H | -3.930912  | -2.499706 | -1.109046 |
| C | 16.908599 | -6.355390 | 2.636314  | H | 0.013283   | 1.334519  | -3.297507 |
| H | 15.088039 | -5.228519 | 2.577795  | C | -8.509265  | -0.786358 | -0.341399 |
| C | 20.049498 | -5.676560 | 0.720725  | C | -7.326587  | -0.362138 | -1.189667 |
| C | 18.227872 | -6.483407 | 2.176516  | H | -8.631627  | -1.877622 | -0.319733 |
| C | 19.664680 | -3.743226 | -0.747462 | C | -9.673034  | -0.100443 | -1.027999 |
| H | 17.750009 | -2.841332 | -0.680074 | C | -5.982812  | -0.674599 | -1.040950 |
| H | 16.527829 | -7.065335 | 3.366264  | C | -7.759517  | 0.473441  | -2.240863 |
| C | 20.546530 | -4.765758 | -0.260757 | C | -11.020059 | -0.111166 | -0.692106 |
| C | 20.897284 | -6.722686 | 1.203954  | C | -9.213705  | 0.637209  | -2.141086 |
| C | 19.100566 | -7.525845 | 2.642216  | C | -5.033889  | -0.160737 | -1.948858 |
| H | 20.030234 | -3.069678 | -1.518768 | H | -5.654839  | -1.294523 | -0.210872 |
| C | 21.864050 | -4.908110 | -0.728142 | C | -6.831984  | 0.990436  | -3.149031 |
| C | 22.208312 | -6.825180 | 0.709124  | C | -11.922650 | 0.612003  | -1.487817 |
| C | 20.376807 | -7.639249 | 2.181318  | H | -11.382182 | -0.656476 | 0.174675  |
| H | 18.715961 | -8.227767 | 3.378059  | C | -10.114574 | 1.362868  | -2.925387 |
| C | 22.684379 | -5.926378 | -0.244954 | C | -5.484525  | 0.668635  | -2.996967 |
| H | 22.238069 | -4.213204 | -1.475806 | H | -7.148102  | 1.627895  | -3.970549 |
| H | 22.851905 | -7.619249 | 1.079307  | C | -11.470499 | 1.339885  | -2.599018 |
| H | 21.026058 | -8.432027 | 2.544525  | H | -9.775785  | 1.931378  | -3.786978 |
| H | 23.701037 | -6.022236 | -0.616047 | H | -4.766762  | 1.047944  | -3.718174 |
| C | -0.038863 | 1.011699  | -2.248836 | H | -12.189329 | 1.878540  | -3.208395 |
| C | 1.104659  | 0.086651  | -1.880829 | H | -8.403667  | -0.468042 | 0.704465  |
| H | -0.036611 | 1.929393  | -1.645078 |   |            |           |           |

**Table S1.** The excitation energies ( $E_{\text{ex}}$ ), oscillator strength ( $f$ ), transition compositions of the two lowest excitations of the compounds calculated by TD-B3LYP/6-31G(d,p) in  $\text{CH}_2\text{Cl}_2$  solvent.

| Compounds    |                       | $E_{\text{ex}}$<br>(eV/nm) | $f$    | Transition composition                                  |
|--------------|-----------------------|----------------------------|--------|---------------------------------------------------------|
| <b>2</b>     | $S_0 \rightarrow S_1$ | 3.52 (352)                 | 1.2856 | 0.63 (H $\rightarrow$ L)+0.20 (H-4 $\rightarrow$ L)     |
|              | $S_0 \rightarrow S_2$ | 4.36 (284)                 | 0.0053 | 0.47 (H $\rightarrow$ L+2)+0.44 (H-1 $\rightarrow$ L+1) |
| <b>5</b>     | $S_0 \rightarrow S_1$ | 3.30 (376)                 | 1.6888 | 0.69 (H $\rightarrow$ L)                                |
|              | $S_0 \rightarrow S_2$ | 3.53 (351)                 | 0.0026 | 0.69 (H-1 $\rightarrow$ L)                              |
| <b>7</b>     | $S_0 \rightarrow S_1$ | 3.19 (388)                 | 2.7264 | 0.69 (H $\rightarrow$ L)                                |
|              | $S_0 \rightarrow S_2$ | 3.44 (360)                 | 0.0137 | 0.69 (H-1 $\rightarrow$ L)                              |
| <b>BPCF</b>  | $S_0 \rightarrow S_1$ | 3.13 (397)                 | 0.0259 | 0.57 (H $\rightarrow$ L)                                |
|              | $S_0 \rightarrow S_2$ | 3.11 (399)                 | 0.9592 | 0.57 (H $\rightarrow$ L+1)                              |
| <b>BPCF2</b> | $S_0 \rightarrow S_1$ | 3.11 (399)                 | 0.3871 | 0.51 (H $\rightarrow$ L)+ 0.44 (H-1 $\rightarrow$ L)    |
|              | $S_0 \rightarrow S_2$ | 3.11 (399)                 | 0.5617 | 0.50 (H $\rightarrow$ L+1)                              |
| <b>BPCF3</b> | $S_0 \rightarrow S_1$ | 3.10 (400)                 | 0.4836 | 0.51 (H $\rightarrow$ L)+0.44 (H-1 $\rightarrow$ L)     |
|              | $S_0 \rightarrow S_2$ | 3.10 (401)                 | 0.4730 | 0.48 (H $\rightarrow$ L+1)                              |

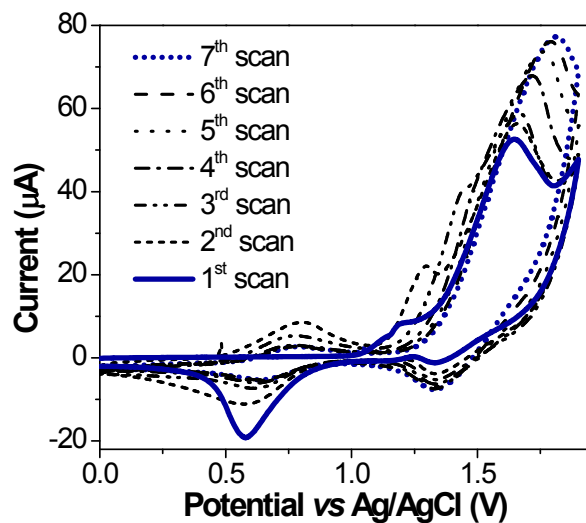

**Figure S2.** CV traces of BPCF2 measured in  $\text{CH}_2\text{Cl}_2/n\text{-Bu}_4\text{NPF}_6$  at scan rate of  $50 \text{ mV s}^{-1}$

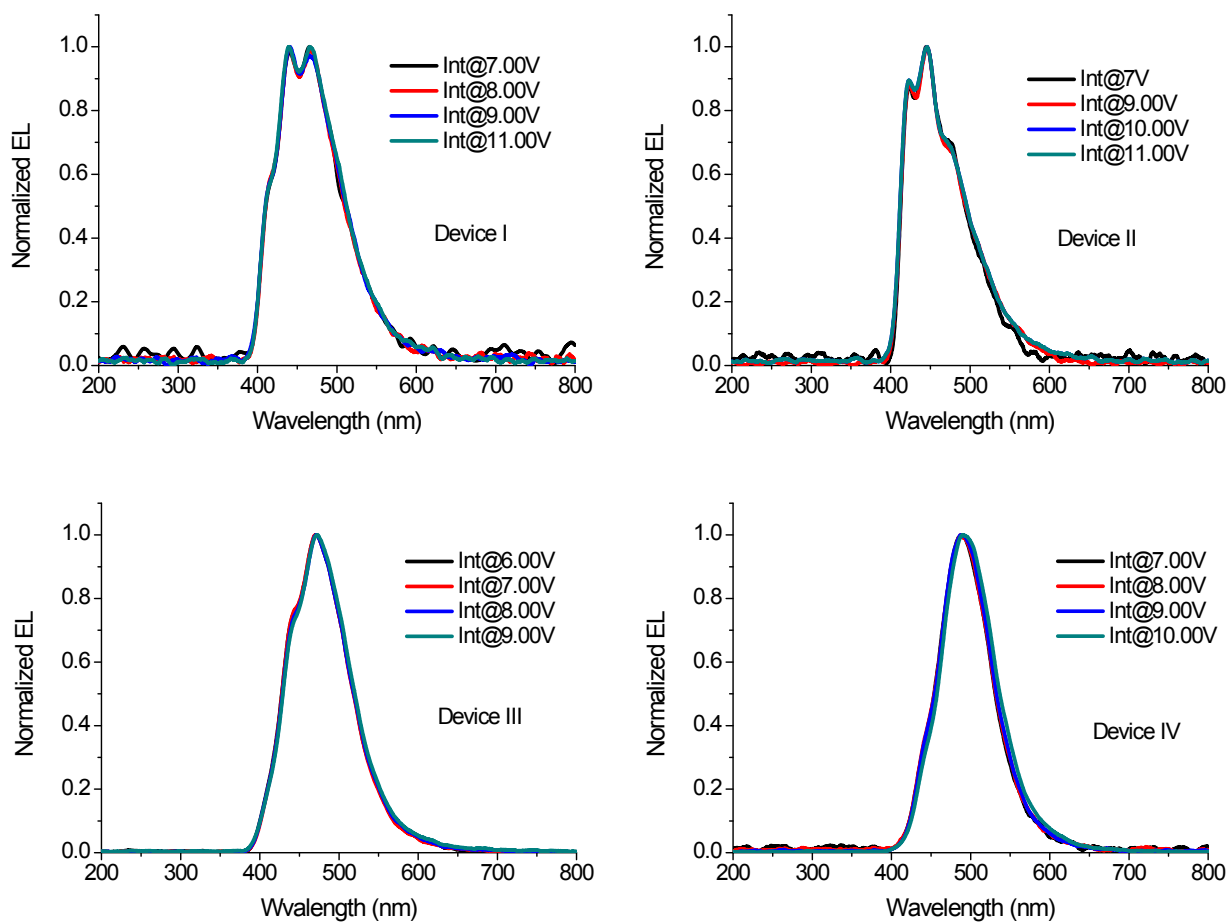

**Figure S3.** EL spectra of the OLEDs at different applied voltages

# <sup>1</sup>H-NMR and <sup>13</sup>C-NMR spectra Compound 2

PROC-01

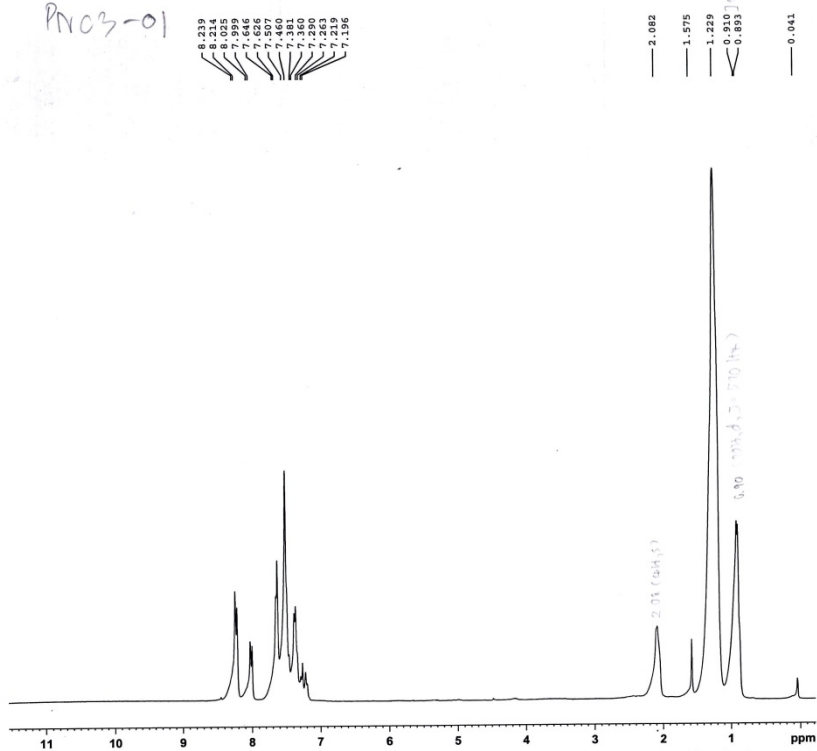

8.239  
8.214  
8.025  
7.686  
7.626  
7.460  
7.381  
7.280  
7.263  
7.239

2.082  
1.575  
1.229  
0.910  
0.893  
0.041

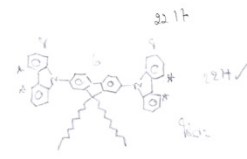

Current Data Parameters  
NAME 11nov2011  
EXPNO 3050  
PROCNO 1

F2 - Acquisition Parameters  
Date\_ 20140616  
Time 15.06  
INSTRUM av300  
PROBHD 5 mm BBO BB-1H  
PULPROG zg  
TD 32768  
SOLVENT CDCl3  
NS 1  
DS 0  
SWH 4496.403 Hz  
FIDRES 0.137219 Hz  
AQ 3.6438515 sec  
RG 50.8  
DW 111.200 usec  
DE 6.00 usec  
TE 300.0 K  
D1 1.00000000 sec

===== CHANNEL f1 =====  
NUC1 1H  
P1 16.50 usec  
PL1 -0.00 dB  
SFO1 300.1313506 MHz

F2 - Processing parameters  
SI 16384  
SF 300.1300053 MHz  
WDW EM  
SSB 0  
LB 1.00 Hz  
GB 0  
PC 1.00

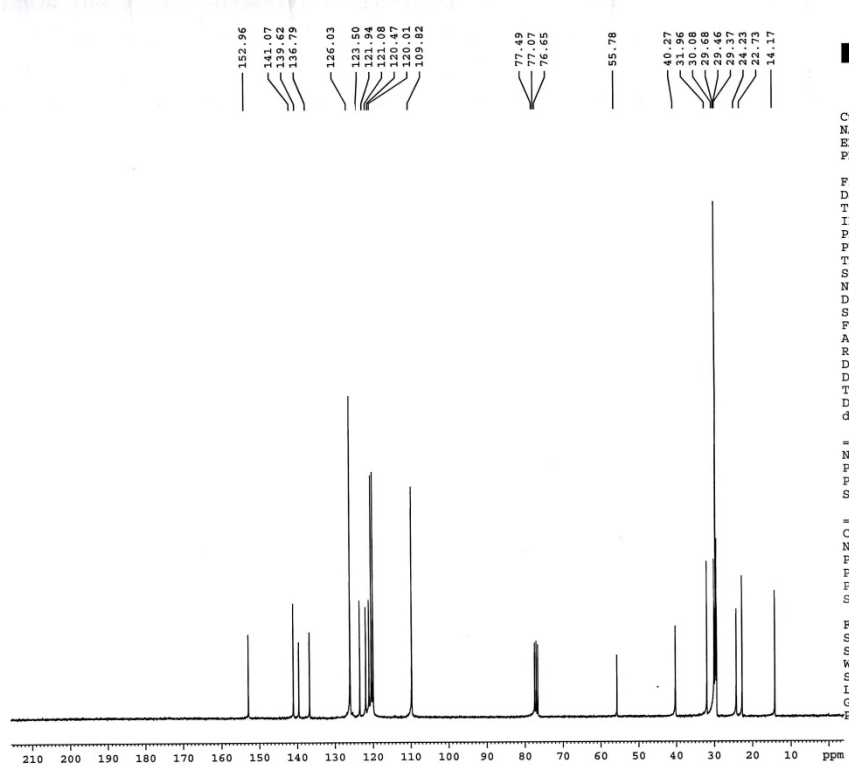

152.96  
141.07  
135.52  
136.79  
126.03  
123.50  
121.24  
121.08  
120.91  
109.82

77.49  
77.07  
76.65  
55.78  
46.27  
31.86  
30.08  
25.68  
25.46  
24.23  
22.73  
14.17

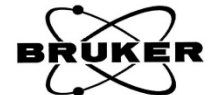

Current Data Parameters  
NAME 11nov2011  
EXPNO 3068  
PROCNO 1

F2 - Acquisition Parameters  
Date\_ 20140620  
Time 13.44  
INSTRUM av300  
PROBHD 5 mm BBO BB-1H  
PULPROG zgdc  
TD 65536  
SOLVENT CDCl3  
NS 4156  
DS 2  
SWH 17985.611 Hz  
FIDRES 0.274439 Hz  
AQ 1.8219508 sec  
RG 1448.2  
DW 27.800 usec  
DE 6.00 usec  
TE 300.0 K  
D1 2.00000000 sec  
d11 0.03000000 sec

===== CHANNEL f1 =====  
NUC1 13C  
P1 7.80 usec  
PL1 -3.00 dB  
SFO1 75.4752953 MHz

===== CHANNEL f2 =====  
CPDPRG2 waltz16  
NUC2 1H  
PCPD2 96.00 usec  
PL2 -6.00 dB  
PL12 6.00 dB  
SFO2 300.1312005 MHz

F2 - Processing parameters  
SI 32768  
SF 75.4677490 MHz  
WDW EM  
SSB 0  
LB 1.00 Hz  
GB 0  
PC 1.40

# Compound 3

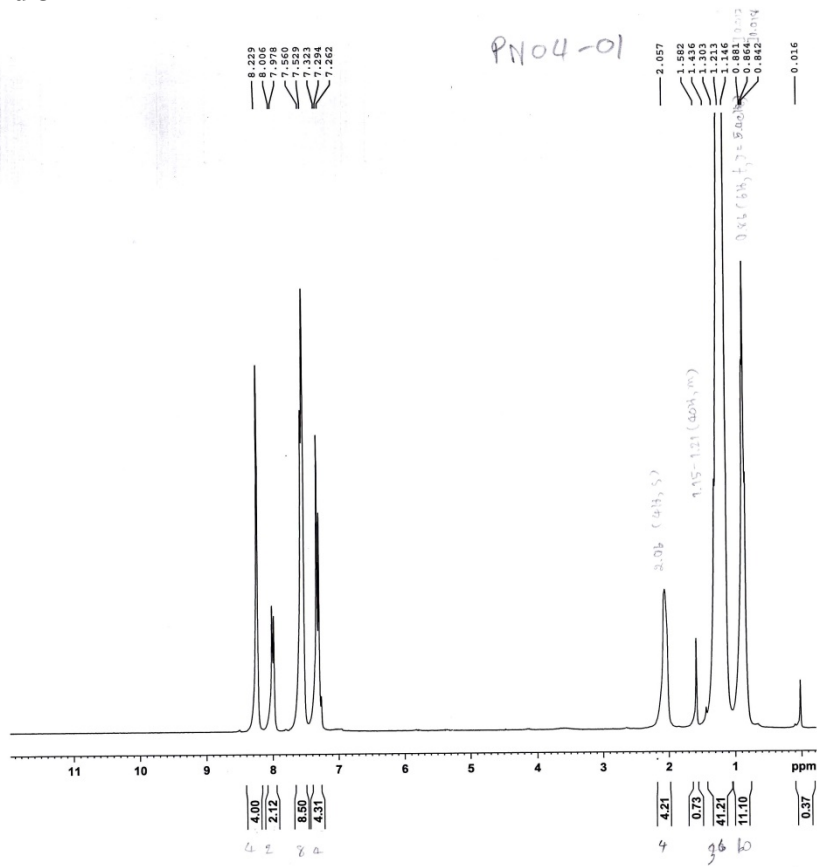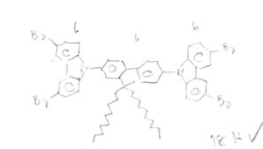

Current Data Parameters  
 NAME 11nov2011  
 EXPNO 3048  
 PROCNO 1

F2 - Acquisition Parameters  
 Date 20140616  
 Time 14.59  
 INSTRUM av300  
 PROBHD 5 mm BBO BB-1H  
 PULPROG zg  
 TD 32768  
 SOLVENT CDCl3  
 NS 4  
 DS 0  
 SWH 4496.403 Hz  
 FIDRES 0.137219 Hz  
 AQ 3.6438515 sec  
 RG 64  
 DW 111.200 usec  
 DE 6.00 usec  
 TE 300.0 K  
 D1 1.0000000 sec

===== CHANNEL f1 =====  
 NUC1 1H  
 P1 16.50 usec  
 PL1 -6.00 dB  
 SFO1 300.1313506 MHz

F2 - Processing parameters  
 SI 16384  
 SF 300.1300053 MHz  
 WDW EM  
 SSB 0  
 LB 1.00 Hz  
 GB 0  
 PC 1.00

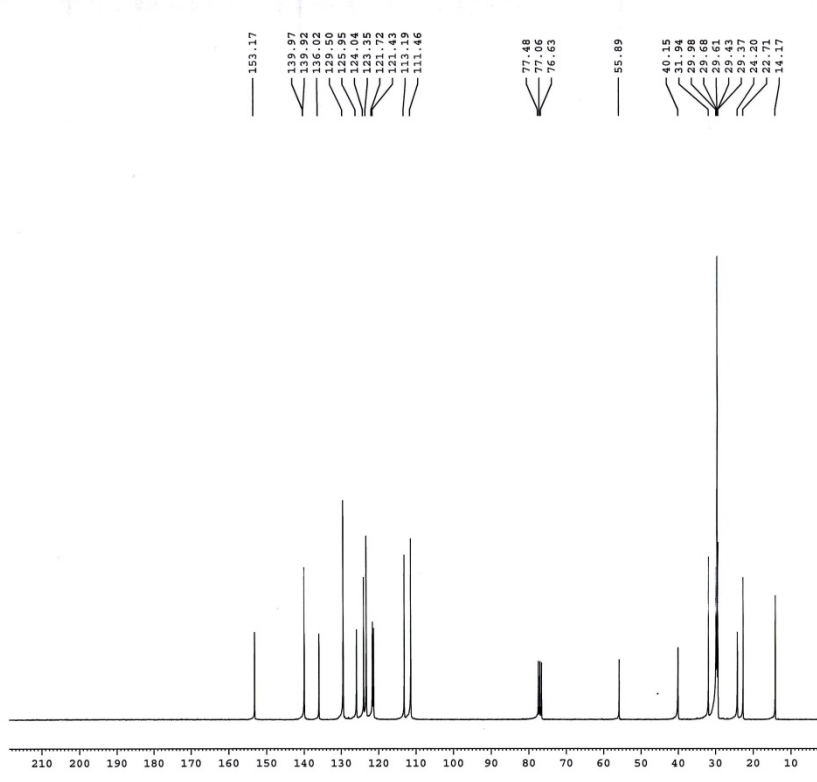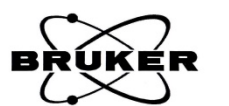

Current Data Parameters  
 NAME 11nov2011  
 EXPNO 3069  
 PROCNO 1

F2 - Acquisition Parameters  
 Date 20140620  
 Time 18.14  
 INSTRUM av300  
 PROBHD 5 mm BBO BB-1H  
 PULPROG zgdc  
 TD 65536  
 SOLVENT CDCl3  
 NS 18432  
 DS 2  
 SWH 17985.611 Hz  
 FIDRES 0.274439 Hz  
 AQ 1.8219508 sec  
 RG 1625.5  
 DW 27.800 usec  
 DE 6.00 usec  
 TE 300.0 K  
 D1 2.0000000 sec  
 d11 0.03000000 sec

===== CHANNEL f1 =====  
 NUC1 13C  
 P1 7.80 usec  
 PL1 -3.00 dB  
 SFO1 75.4752953 MHz

===== CHANNEL f2 =====  
 CPDPRG2 waltz16  
 NUC2 1H  
 FCPD2 96.00 usec  
 PL2 -6.00 dB  
 PL12 6.00 dB  
 SFO2 300.1312005 MHz

F2 - Processing parameters  
 SI 32768  
 SF 75.4677490 MHz  
 WDW EM  
 SSB 0  
 LB 1.00 Hz  
 GB 0  
 PC 1.40



Compound 4

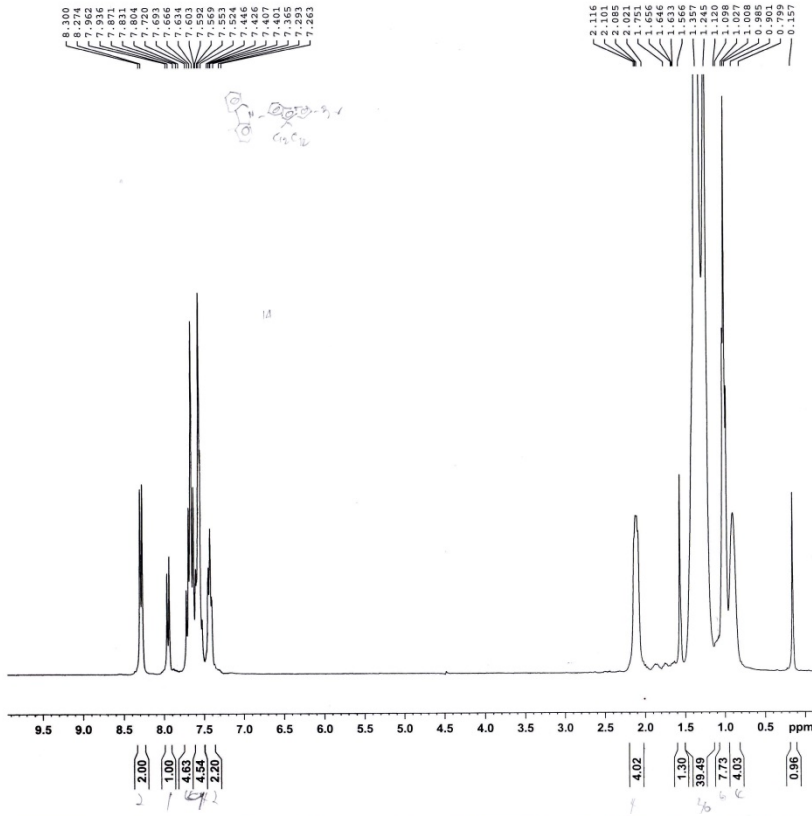

Current Data Parameters  
 NAME Nov2010  
 EXPNO 3723  
 PROCNO 1

F2 - Acquisition Parameters  
 Date\_ 20111021  
 Time 15.47  
 INSTRUM av300  
 PROBHD 5 mm BBO BB-1H  
 PULPROG zg  
 TD 32768  
 SOLVENT CDCl3  
 NS 1  
 DS 0  
 SWH 4496.403 Hz  
 FIDRES 0.137219 Hz  
 AQ 3.6438515 sec  
 RG 11.3  
 DW 111.200 usec  
 DE 6.00 usec  
 TE 300.0 K  
 D1 1.00000000 sec

===== CHANNEL f1 =====  
 NUC1 1H  
 P1 16.50 usec  
 PL1 -6.00 dB  
 SF01 300.1313506 MHz

F2 - Processing parameters  
 SI 16384  
 SF 300.1300053 MHz  
 WDW EM  
 SSB 0  
 LB 1.00 Hz  
 GB 0  
 PC 1.00

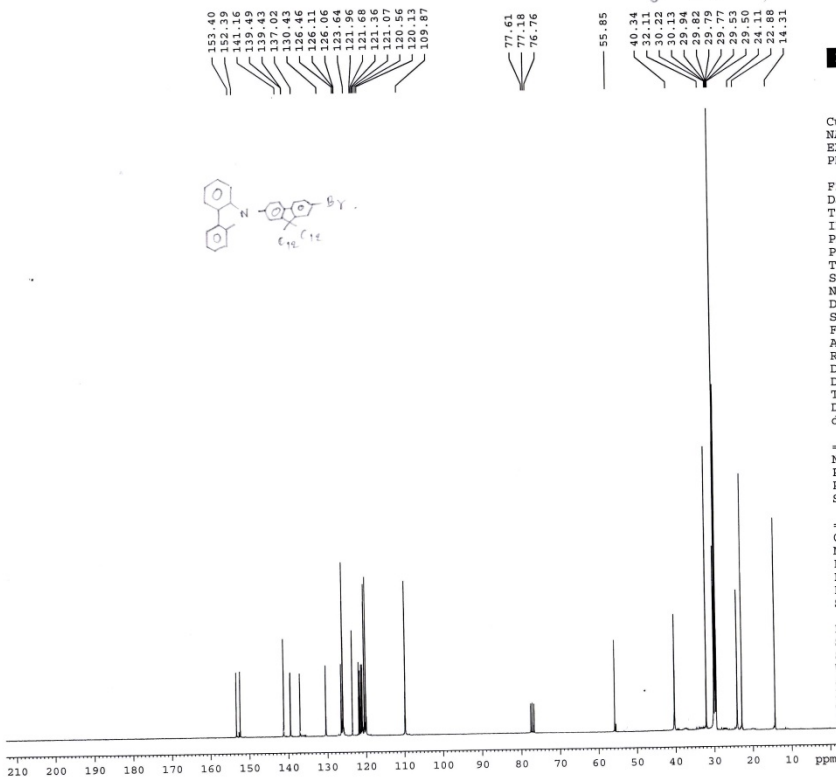

Current Data Parameters  
 NAME 11nov2011  
 EXPNO 504  
 PROCNO 1

F2 - Acquisition Parameters  
 Date\_ 20120315  
 Time 20.02  
 INSTRUM av300  
 PROBHD 5 mm BBO BB-1H  
 PULPROG zgdc  
 TD 65536  
 SOLVENT CDCl3  
 NS 1933  
 DS 2  
 SWH 17985.611 Hz  
 FIDRES 0.274439 Hz  
 AQ 1.8219508 sec  
 RG 4597.6  
 DW 27.800 usec  
 DE 6.00 usec  
 TE 300.0 K  
 D1 2.00000000 sec  
 d11 0.03000000 sec

===== CHANNEL f1 =====  
 NUC1 13C  
 P1 7.60 usec  
 PL1 -3.00 dB  
 SF01 75.4752953 MHz

===== CHANNEL f2 =====  
 CPDPRG2 waltz16  
 NUC2 1H  
 PCPD2 96.00 usec  
 PL2 -6.00 dB  
 PL12 6.00 dB  
 SFO2 300.1312005 MHz

F2 - Processing parameters  
 SI 32768  
 SF 75.4677490 MHz  
 WDW EM  
 SSB 0  
 LB 1.00 Hz  
 GB 0  
 PC 1.00

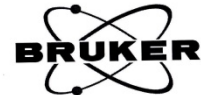

Compound 5

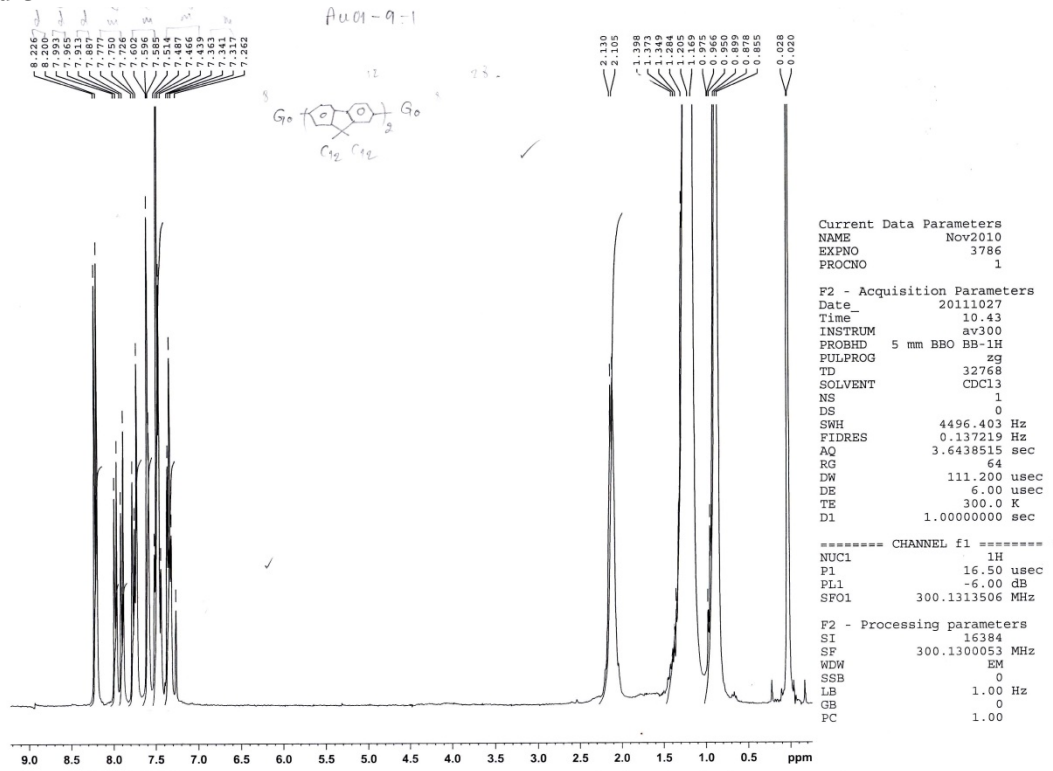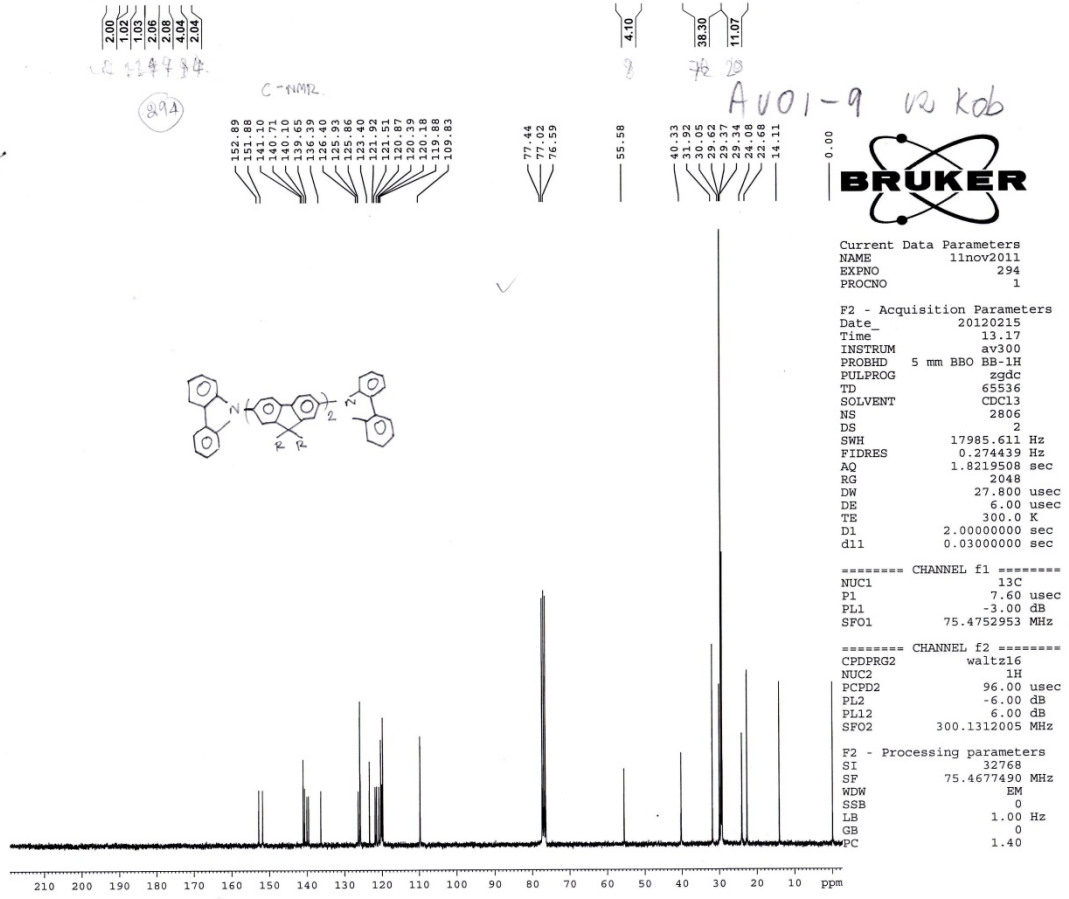

# Compound 6

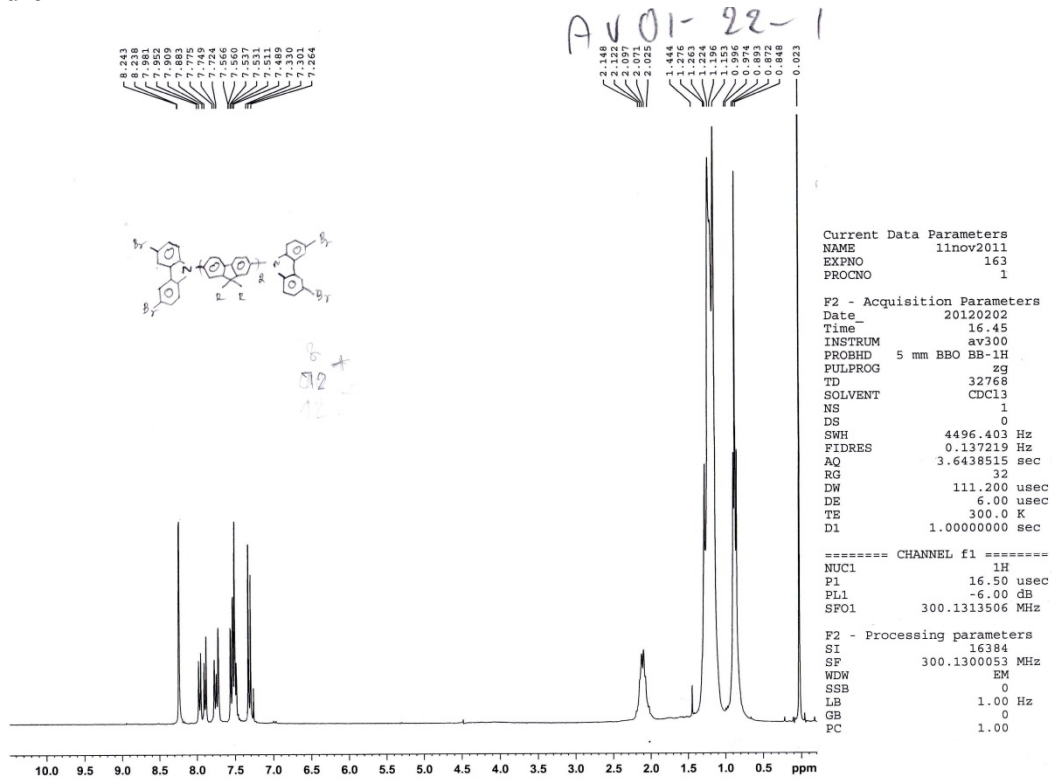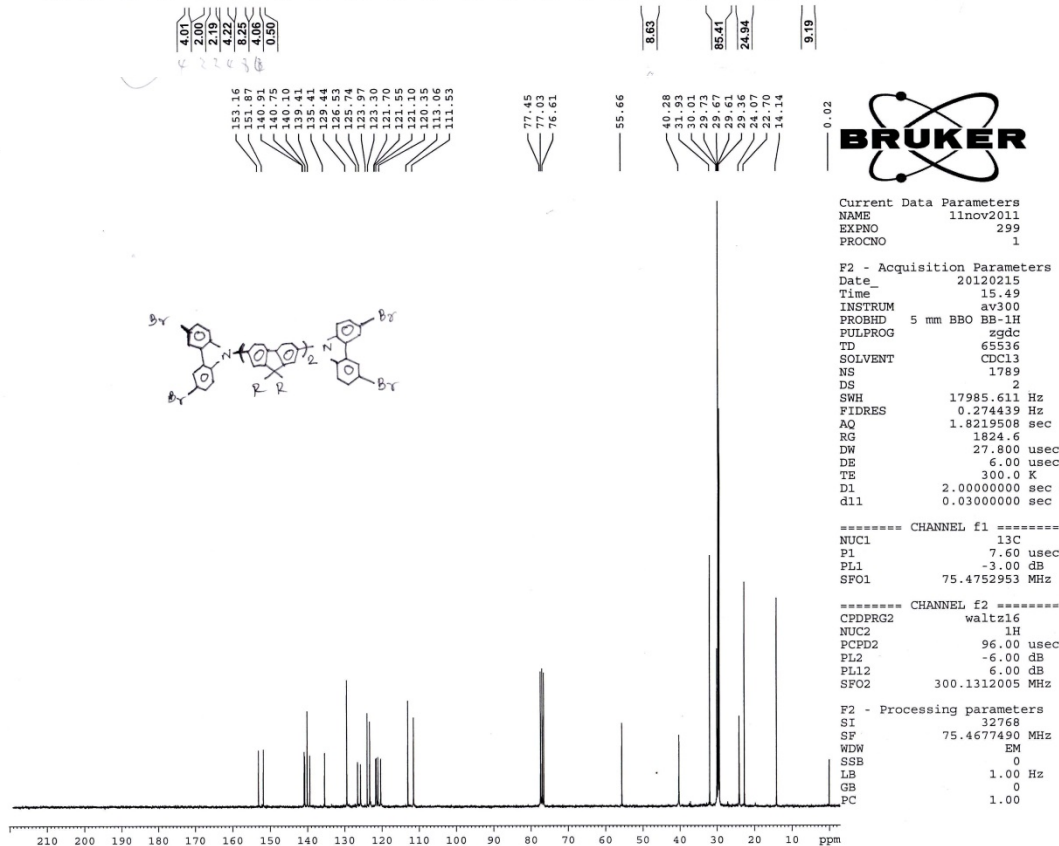

Compound 7

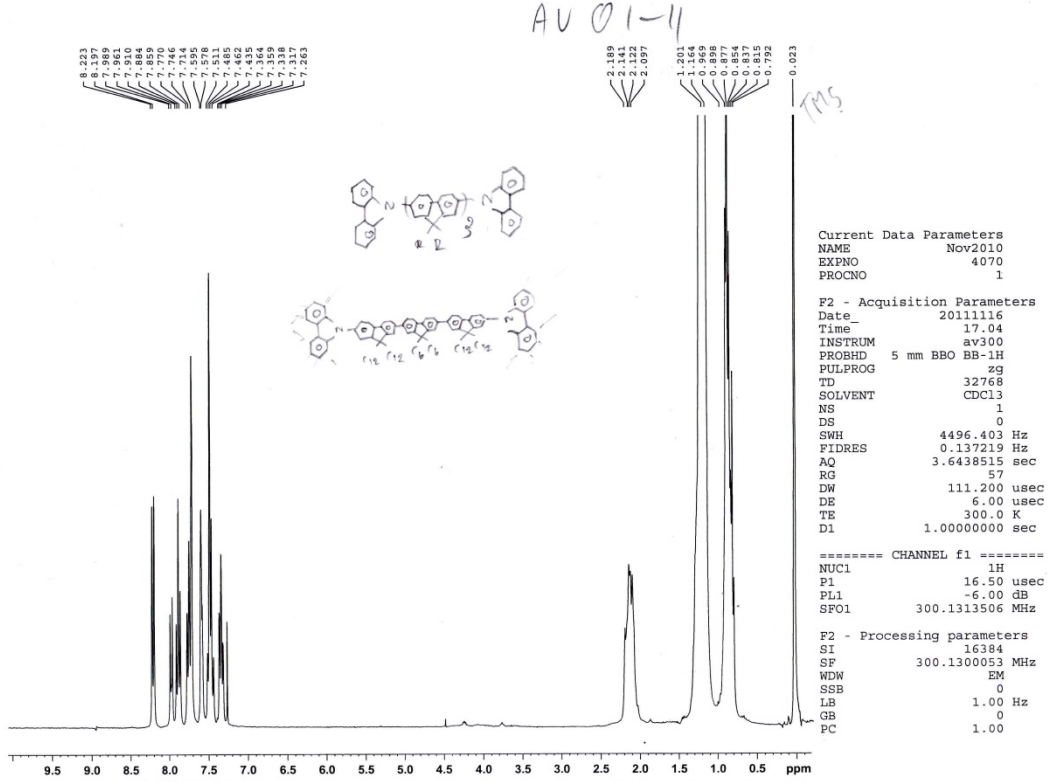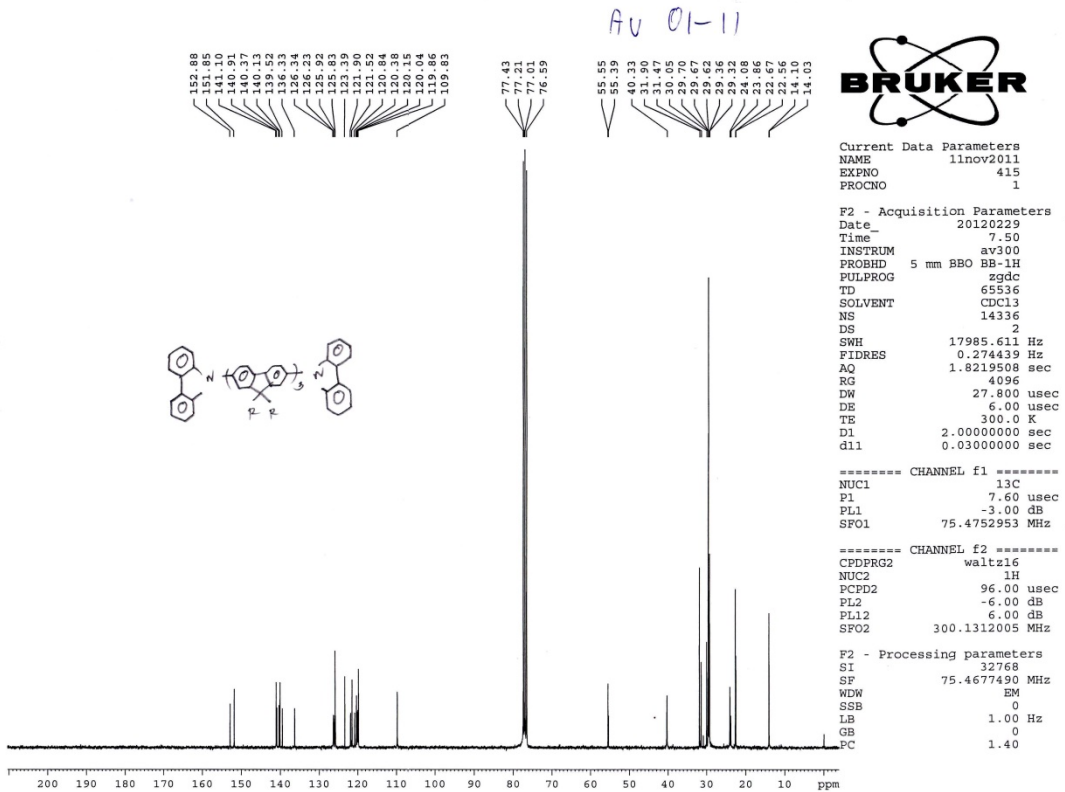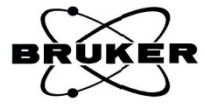

# Compound 8

AV 01-19-1 12/1/2011

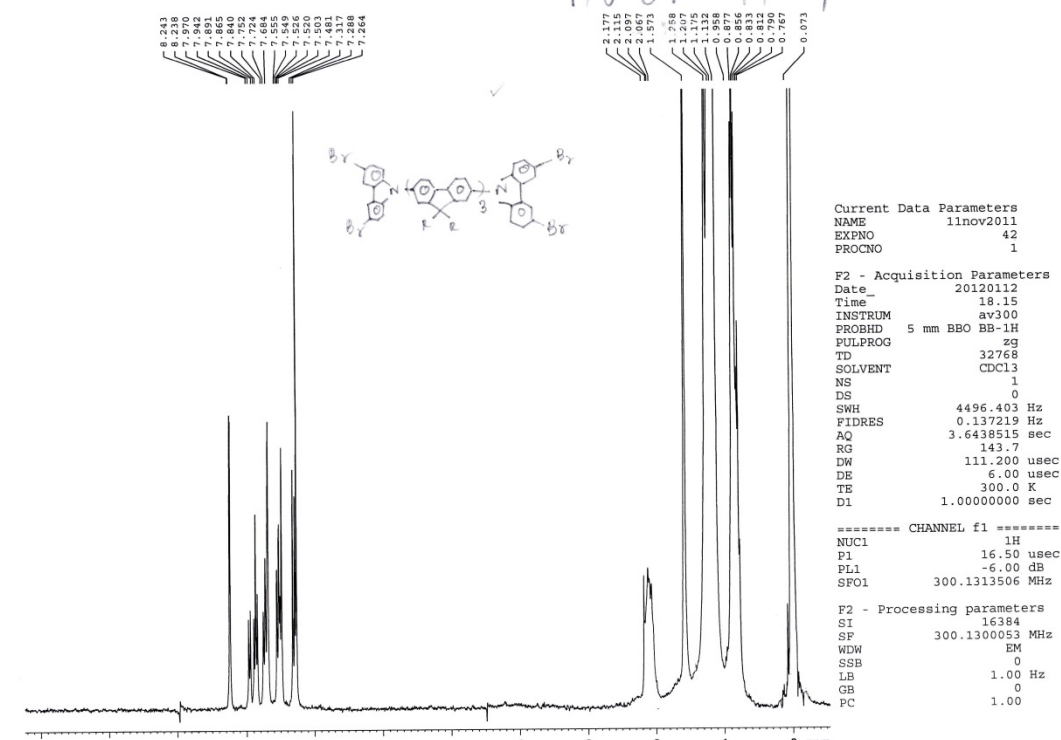

Current Data Parameters  
 NAME 11nov2011  
 EXPNO 42  
 PROCNO 1

F2 - Acquisition Parameters  
 Date 20120112  
 Time 18.15  
 INSTRUM av300  
 PROBHD 5 mm BBO BB-1H  
 PULPROG zg  
 TD 32768  
 SOLVENT CDCl3  
 NS 1  
 DS 0  
 SWH 4496.403 Hz  
 FIDRES 0.137219 Hz  
 AQ 3.6438515 sec  
 RG 143.7  
 DW 111.200 usec  
 DE 6.00 usec  
 TE 300.0 K  
 D1 1.00000000 sec

===== CHANNEL f1 =====  
 NUC1 1H  
 P1 16.50 usec  
 PL1 -6.00 dB  
 SFO1 300.1313506 MHz

F2 - Processing parameters  
 SI 16384  
 SF 300.1300053 MHz  
 WDW EM  
 SSB 0  
 LB 1.00 Hz  
 GB 0  
 PC 1.00

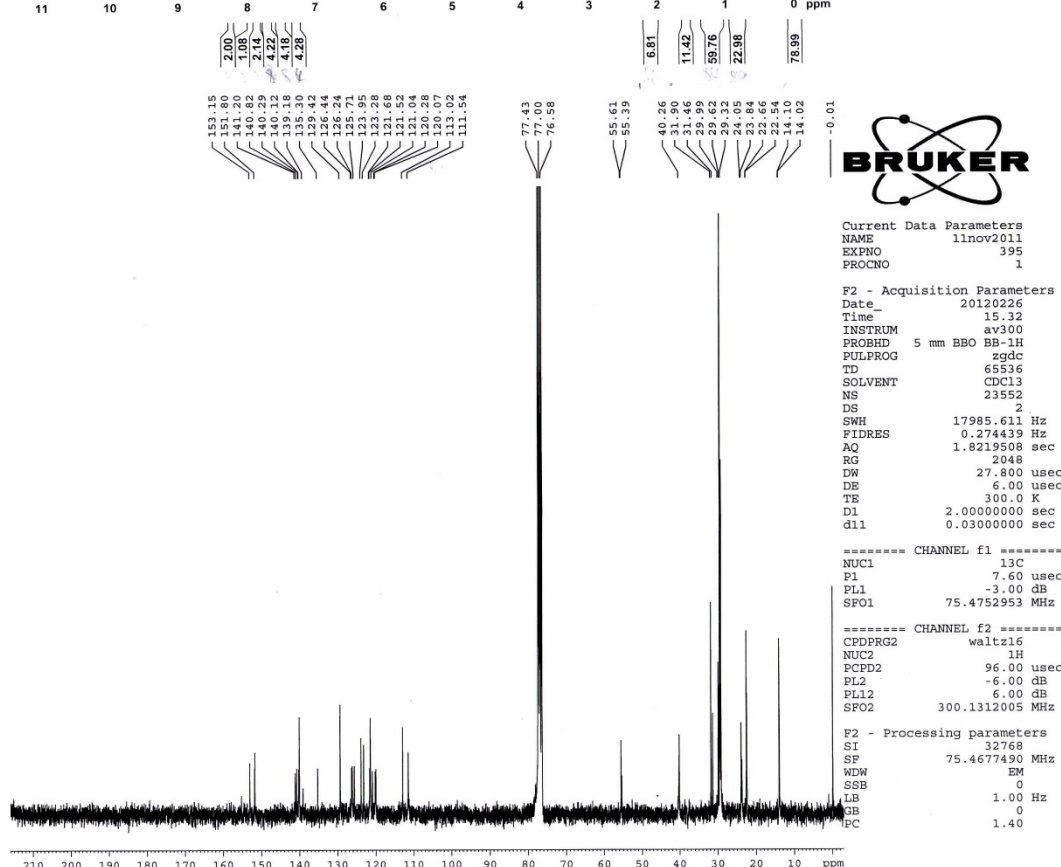

Current Data Parameters  
 NAME 11nov2011  
 EXPNO 395  
 PROCNO 1

F2 - Acquisition Parameters  
 Date 20120226  
 Time 15.32  
 INSTRUM av300  
 PROBHD 5 mm BBO BB-1H  
 PULPROG zgdc  
 TD 65536  
 SOLVENT CDCl3  
 NS 23552  
 DS 2  
 SWH 17985.611 Hz  
 FIDRES 0.274439 Hz  
 AQ 1.8219508 sec  
 RG 2048  
 DW 27.800 usec  
 DE 6.00 usec  
 TE 300.0 K  
 D1 2.00000000 sec  
 d11 0.03000000 sec

===== CHANNEL f1 =====  
 NUC1 13C  
 P1 7.60 usec  
 PL1 -3.00 dB  
 SFO1 75.4752953 MHz

===== CHANNEL f2 =====  
 CPDPRG2 waltz16  
 NUC2 1H  
 P1 96.00 usec  
 PL2 -6.00 dB  
 PL12 6.00 dB  
 SFO2 300.1312005 MHz

F2 - Processing parameters  
 SI 32768  
 SF 75.4677490 MHz  
 WDW EM  
 SSB 0  
 LB 1.00 Hz  
 GB 0  
 PC 1.40

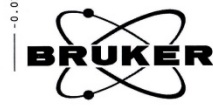

BPCF

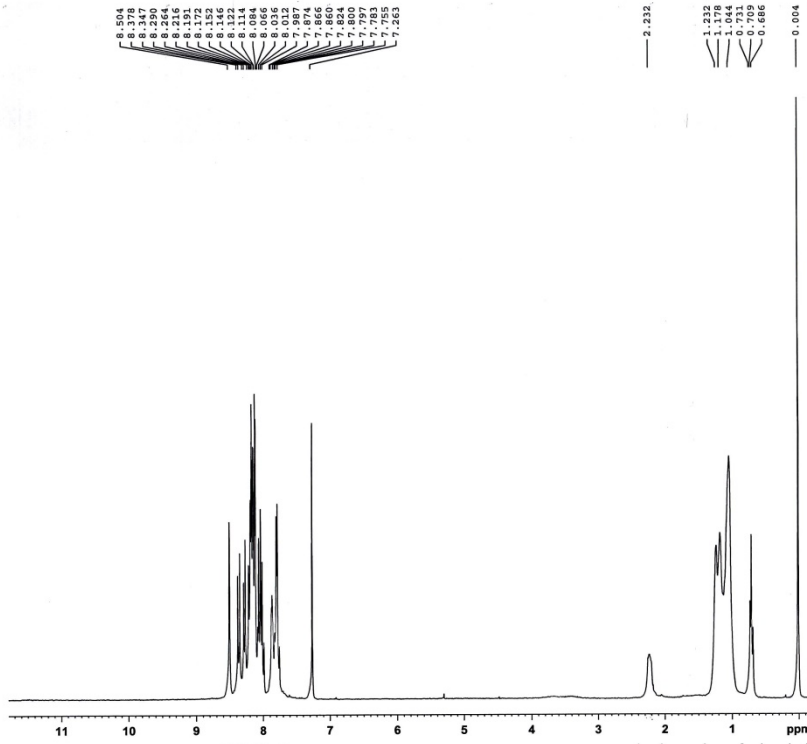

PN 05-01  
cphre 4

Current Data Parameters  
 NAME 11nov2011  
 EXPNO 3076  
 PROCNO 1

F2 - Acquisition Parameters  
 Date\_ 20140623  
 Time 10.38  
 INSTRUM av300  
 PROBHD 5 mm BBO BB-1H  
 PULPROG zg  
 TD 32768  
 SOLVENT CDCl3  
 NS 8  
 DS 0  
 SWH 4496.403 Hz  
 FIDRES 0.137219 Hz  
 AQ 3.6438515 sec  
 RG 256  
 DW 111.200 usec  
 DE 6.00 usec  
 TE 300.0 K  
 D1 1.00000000 sec

===== CHANNEL f1 =====  
 NUC1 1H  
 P1 16.50 usec  
 PL1 -6.00 dB  
 SFO1 300.1313506 MHz

F2 - Processing parameters  
 SI 16384  
 SF 300.1300053 MHz  
 WDW EM  
 SSB 0  
 LB 1.00 Hz  
 GB 0  
 PC 1.00

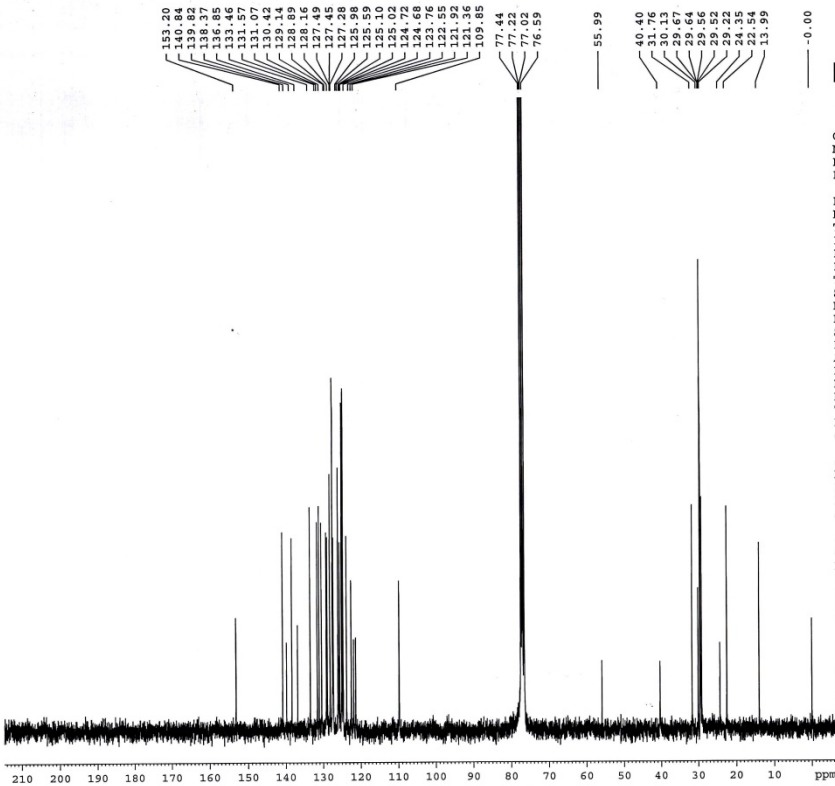

BRUKER

Current Data Parameters  
 NAME 11nov2011  
 EXPNO 3077  
 PROCNO 1

F2 - Acquisition Parameters  
 Date\_ 20140623  
 Time 15.55  
 INSTRUM av300  
 PROBHD 5 mm BBO BB-1H  
 PULPROG zgdc  
 TD 65536  
 SOLVENT CDCl3  
 NS 18432  
 DS 2  
 SWH 17985.611 Hz  
 FIDRES 0.274439 Hz  
 AQ 1.8219508 sec  
 RG 181  
 DW 27.800 usec  
 DE 6.00 usec  
 TE 300.0 K  
 D1 2.00000000 sec  
 d11 0.03000000 sec

===== CHANNEL f1 =====  
 NUC1 13C  
 P1 7.80 usec  
 PL1 -3.00 dB  
 SFO1 75.4752953 MHz

===== CHANNEL f2 =====  
 CPDPRG2 waltz16  
 NUC2 1H  
 PCPD2 96.00 usec  
 PL2 -6.00 dB  
 PL12 6.00 dB  
 SFO2 300.1312005 MHz

F2 - Processing parameters  
 SI 32768  
 SF 75.4677490 MHz  
 WDW EM  
 SSB 0  
 LB 1.00 Hz  
 GB 0  
 PC 1.40

BPCF2

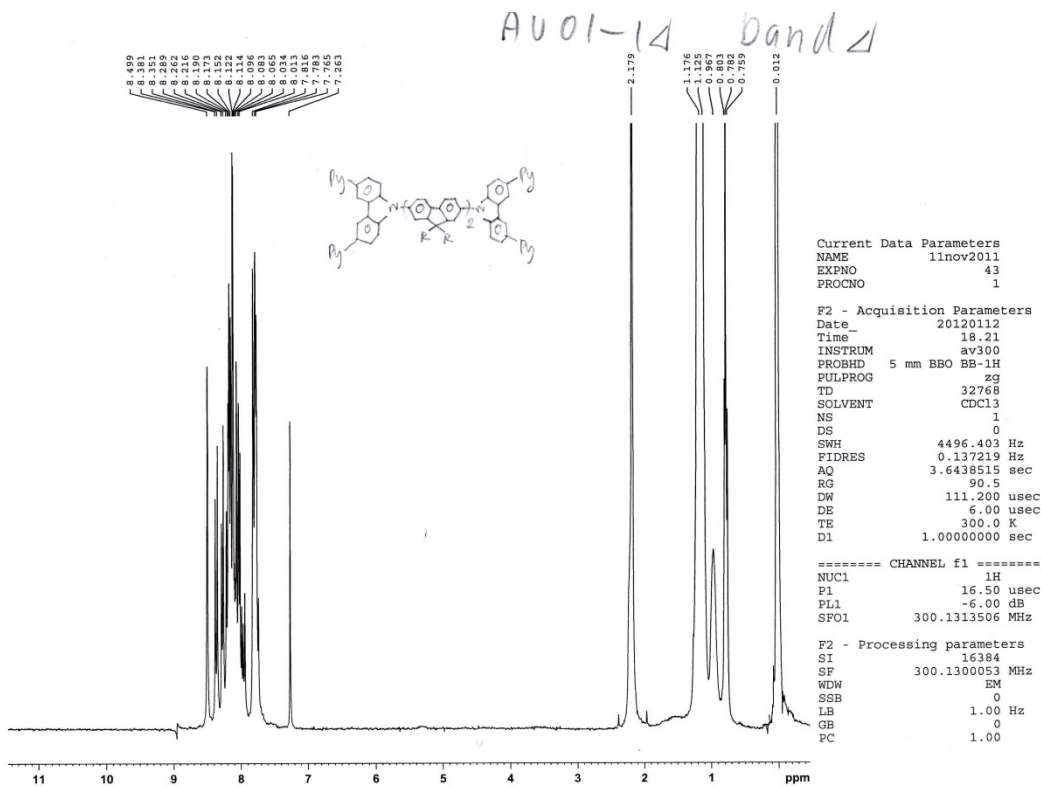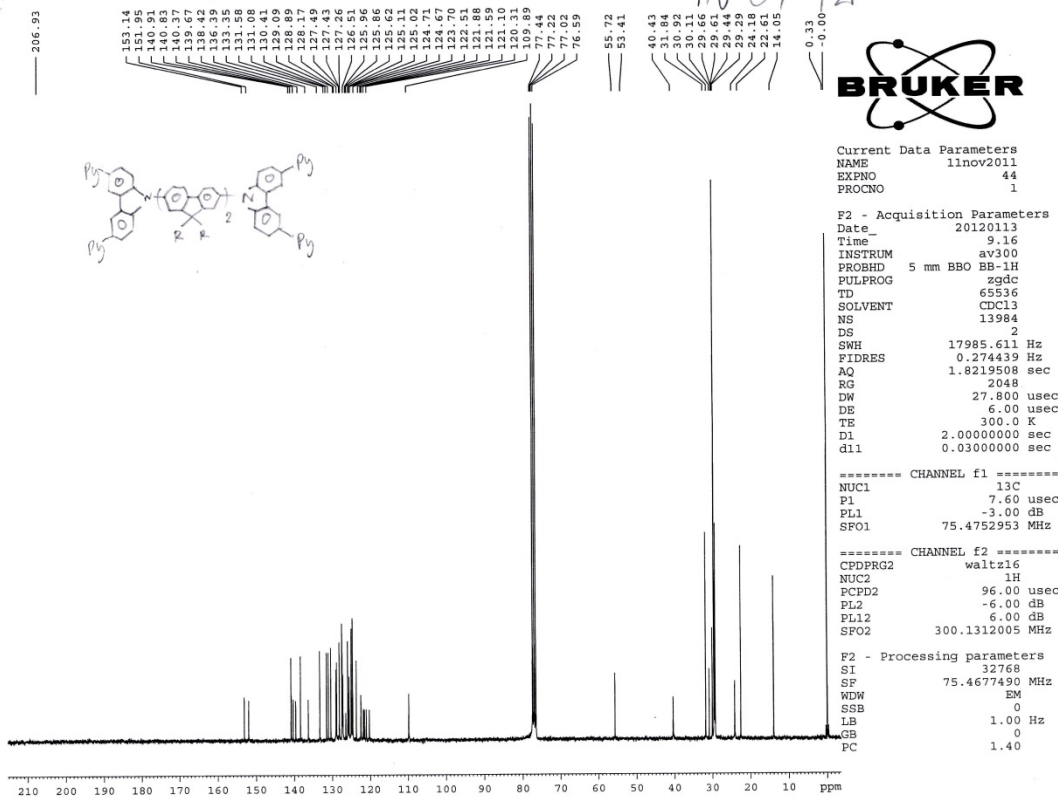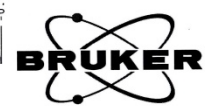

BPCF3

AU 01-20

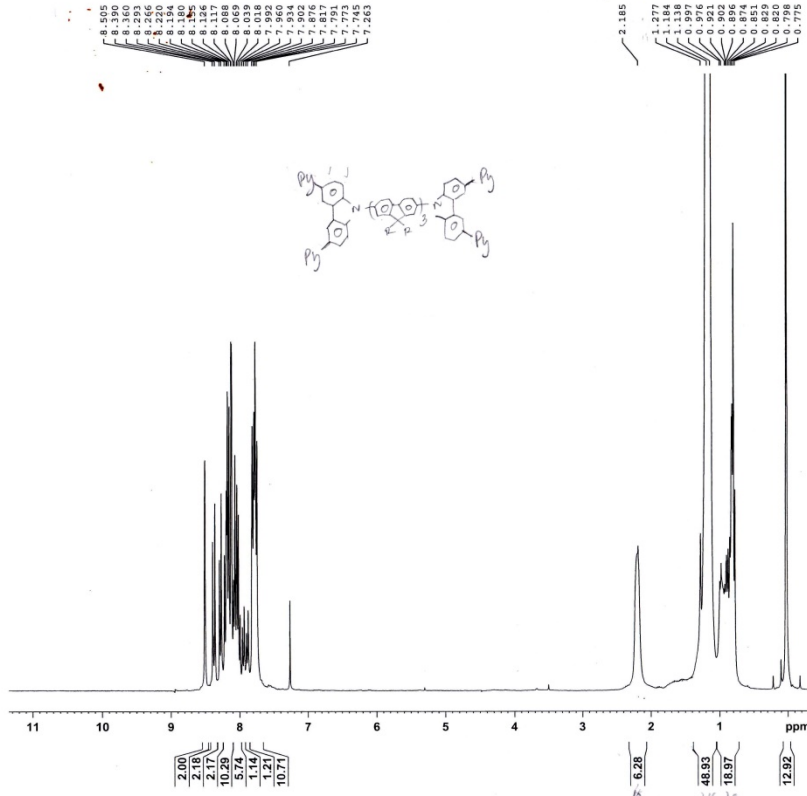

Current Data Parameters  
 NAME 11nov2011  
 EXPNO 118  
 PROCNO 1

F2 - Acquisition Parameters  
 Date\_ 20120127  
 Time 17.44  
 INSTRUM av300  
 PROBHD 5 mm BBO BB-1H  
 PULPROG zg  
 TD 32768  
 SOLVENT CDCl3  
 NS 4  
 DS 0  
 SWH 4496.403 Hz  
 FIDRES 0.137219 Hz  
 AQ 3.6438515 sec  
 RG 90.5  
 DW 111.200 usec  
 DE 6.00 usec  
 TE 300.0 K  
 D1 1.00000000 sec

===== CHANNEL f1 =====  
 NUC1 1H  
 P1 16.50 usec  
 PL1 -6.00 dB  
 SFO1 300.1313506 MHz

F2 - Processing parameters  
 SI 16384  
 SF 300.1300053 MHz  
 WDW EM  
 SSB 0  
 LB 1.00 Hz  
 GB 0  
 PC 1.00

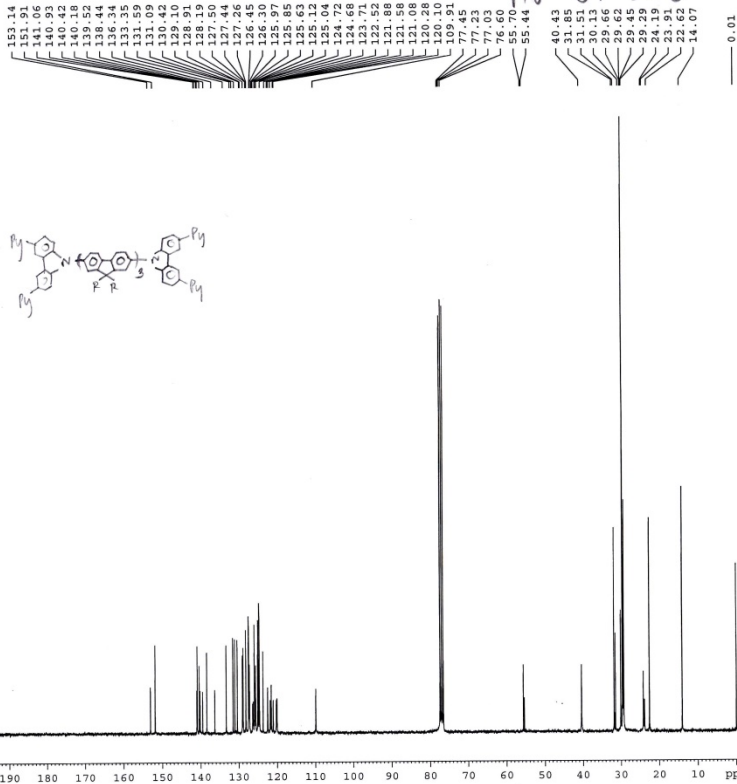

BRUKER

Current Data Parameters  
 NAME 11nov2011  
 EXPNO 154  
 PROCNO 1

F2 - Acquisition Parameters  
 Date\_ 20120202  
 Time 9.24  
 INSTRUM av300  
 PROBHD 5 mm BBO BB-1H  
 PULPROG zgdc  
 TD 65536  
 SOLVENT CDCl3  
 NS 12288  
 DS 2  
 SWH 17985.611 Hz  
 FIDRES 0.274439 Hz  
 AQ 1.8219508 sec  
 RG 4096  
 DW 27.800 usec  
 DE 6.00 usec  
 TE 300.0 K  
 D1 2.00000000 sec  
 d11 0.03000000 sec

===== CHANNEL f1 =====  
 NUC1 13C  
 P1 7.60 usec  
 PL1 -3.00 dB  
 SFO1 75.4752953 MHz

===== CHANNEL f2 =====  
 CPDPRG2 waltz16  
 NUC2 1H  
 PCPD2 96.00 usec  
 PL2 -6.00 dB  
 PL12 6.00 dB  
 SFO2 300.1312005 MHz

F2 - Processing parameters  
 SI 32768  
 SF 75.4677490 MHz  
 WDW EM  
 SSB 0  
 LB 1.00 Hz  
 GB 0  
 PC 1.40
